# Supplementary material for: Determining acute nurse staffing: a hermeneutic review of an evolving science
Source: PubMed Central journal article supplement (PMC6475222; doi:10.1136/bmjopen-2018-025654), 2019-03-30
Supplement: bmjopen-2018-025654.draft_revisions.pdf [file bmjopen-2018-025654.draft_revisions.pdf]

# BMJ Open

BMJ Open is committed to open peer review. As part of this commitment we make the peer review history of every article we publish publicly available.

When an article is published we post the peer reviewers' comments and the authors' responses online. We also post the versions of the paper that were used during peer review. These are the versions that the peer review comments apply to.

The versions of the paper that follow are the versions that were submitted during the peer review process. They are not the versions of record or the final published versions. They should not be cited or distributed as the published version of this manuscript.

BMJ Open is an open access journal and the full, final, typeset and author-corrected version of record of the manuscript is available on our site with no access controls, subscription charges or pay-per-view fees (<http://bmjopen.bmj.com>).

If you have any questions on BMJ Open's open peer review process please email [info.bmjopen@bmj.com](mailto:info.bmjopen@bmj.com)

# BMJ Open

## Determining acute nurse staffing, a hermeneutic review of an evolving science.

|                               |                                                                                                 |
|-------------------------------|-------------------------------------------------------------------------------------------------|
| Journal:                      | <i>BMJ Open</i>                                                                                 |
| Manuscript ID                 | bmjopen-2018-025654                                                                             |
| Article Type:                 | Research                                                                                        |
| Date Submitted by the Author: | 27-Jul-2018                                                                                     |
| Complete List of Authors:     | leary, Alison; London South Bank University<br>Punshon, Geoffrey; London South Bank University, |
| Keywords:                     | Nursing, Staffing, Skillmix, Education, Safety, Modelling                                       |
|                               |                                                                                                 |

SCHOLARONE™  
Manuscripts

view only

1  
2  
3 **Title: Determining acute nurse staffing, a hermeneutic review of an evolving**  
4 **science.**  
5

6 Authors: Alison Leary<sup>1</sup>, Geoffrey Punshon<sup>1</sup>  
7

8 Corresponding author: Alison Leary London South Bank University, School of Health  
9 and Social Care, 103 Borough Road, London UK SE1 0AA. Email:  
10 alisonleary@yahoo.com Telephone/Fax: 0207 450 6064  
11

12 <sup>1</sup> London South Bank University, London, UK.  
13

14 **Key words**  
15

16 Staffing, Safety, Nursing, Skillmix, Education, Modelling, Hermeneutics  
17  
18

19 **Word count**  
20

21 4002  
22  
23  
24  
25  
26  
27  
28  
29  
30  
31  
32  
33  
34  
35  
36  
37  
38  
39  
40  
41  
42  
43  
44  
45  
46  
47  
48  
49  
50  
51  
52  
53  
54  
55  
56  
57  
58  
59  
60

## Abstract

### Objectives

Calculating nurse staffing in the acute hospital has become a key issue but solutions appear distant. Community, mental health and areas such as learning disability nursing have attracted less attention and remain intractable. This review aims to examine current approaches to the issue across many disciplines.

### Design

The approach taken is iterative and in the form of a hermeneutic review. 769 pieces of evidence were reviewed from across disciplines such as nursing, medicine, engineering, statistics, population science, computer science and mathematics where nurse staffing was the subject of the study.

### Results

A number of themes emerged. The first iteration showed the predominance of unit base approaches (e.g. nurse numbers, ratios, activity and workload) the second was the development of methodologies. Subsequent iterations examined issues such as demand, safety, nurse education, turnover, patient outcomes, patient or staff satisfaction, workload and activity. The majority of studies examined (n=767) demonstrated some association between staffing (units or type/skill) and various factors such as staff or patient satisfaction, working conditions, safety parameters, outcomes complexity of work achieved, work left undone or other factors. Many potential areas such as operational safety research were not utilised.

### Conclusion

Although the relationship between staffing in acute care and factors such as units, safety or workload is complex, the evidence suggests an interdependent relationship on many levels which should only be dismissed with caution. The nature of these relationships should be further examined in order to determine nurse staffing.

### Strengths and limitations of this study

- The study is a review of the existing literature across many fields and focuses on cross disciplinary approaches.
- The study encompasses many fields and breadth rather than depth limits the analysis.
- This study examines the issue of safe staffing from a wider operational safety perspective and suggests this could uncover additional insight and solutions.

- A limitation of the study is that the body of knowledge is large and complex yet appears to have little impact on policy.

## Introduction

The question of registered nurses staffing hospitals to a level that is safe, high quality and cost effective has become a key issue worldwide. In terms of research it has also become something of a Gordian knot-one that attracts many attempts to solve but few solutions. Extending this question to community nursing and areas such as mental health or learning disability nursing demonstrate the complexity of the problem. Fundamental questions such as “How many nurses are needed?” “What kind of skill mix?” “Are staffing ratios the solution?” remain largely unanswered.

These issues present interesting theoretical problems but they have a very real world application as they underpin the safety of patients both in hospital and community. It could be argued that nursing is only visible by its absence such as those reported by Francis in the enquiry into the deaths at Mid Staffordshire NHS Foundation trust<sup>1</sup>. Nursing is the largest part of the healthcare workforce<sup>2</sup> and attempts to curtail costs have seen radical workforce changes including reducing the number of registered nurses or replacing them with assistive personnel (Needleman 2016). It is of interest that there have been a number of coroners commenting on staffing levels under section 28 of the Coroners & Justice Act 2009<sup>3</sup>. This allows a Coroner in England to report circumstances where it may prevent further deaths. There are several examples of this for both the acute and care home sectors in recent years<sup>4</sup>.

Issues of staffing are further complicated by a lack of consensus within the profession around the levels of care that should be provided or calculated. Is there a difference between safe care and good care? Should all care be given by a registered nurse (RN)? Certainly, policy decisions in England are promoting the transfer of care to assistive personnel such as Nursing Associates<sup>5</sup> for a variety of reasons such as shortage of RNs and increasing costs. Financial burden is a primary driver of workforce determinants. Investing in one aspect of staffing often means scaling back elsewhere, resulting in “trade-offs” for example using less educated staff or changing nurse patient ratios<sup>6</sup>.

Different countries within the UK are taking different policy positions on staffing which varies from guidance in England to legislation in Scotland and Wales<sup>7</sup>.

In order to make sense of the variation in published work a hermeneutic approach is taken. Such an approach is to question and to remain open to what might be revealed<sup>8</sup>. Different researchers have used different approaches to understand various aspects of this problem and the aim of this work to reveal a deeper understanding and understand more about the interrelational nature of the problem.

1  
2  
3 This paper reviews the approaches that have been used to investigate the idea of  
4 safe staffing, the knowledge elicited and explores direction this area of research  
5 might take in the future.  
6  
7

## 8 9 **Method**

10  
11 Hermeneutic reviews<sup>9</sup> utilise a process of searching and interpretation as  
12 interrelational activity (Figure 1). This is because the focus is on the understanding  
13 and interpretation of the materials. In a subject with a high volume of literature, this  
14 approach allows the integration of interpretation and analysis of the literature and the  
15 development of searching as part of the review. A hermeneutic framework describes  
16 the literature review process as fundamentally a process of developing  
17 understanding that is iterative in nature<sup>9</sup>. This has allowed a much wider perspective  
18 incorporating a wider search and analysis than for example a systematic review  
19 utilising methods such as PRISMA<sup>10</sup>. This body of evidence uses an extremely  
20 diverse set of methodologies ranging from inductive studies reliant on qualitative  
21 data to areas of computational mathematics. This would make approaches such as  
22 meta-analysis almost impossible.  
23  
24  
25  
26

27 ***Insert Figure 1 here***

28  
29 Initial reading indicated that the work on this topic was not limited to the nursing  
30 literature and so the first iteration was to expand the search to areas such as  
31 computer science, maths and engineering. A search of the common databases was  
32 undertaken including those in informatics and computational mathematics (PubMed,  
33 CINAHL, arXiv, CiteSeerX, IEEEExplore) using search terms “nursing” (for computer  
34 science, maths and engineering only as this is a minority term) “nurse staffing”  
35 “nurse workload” “hospital staffing” “nursing ratios” “safe staffing” “staffing” AND  
36 “patient safety” in the past 15 years (2003-2018). All terms were in English. A  
37 successive fractions approach was used to refine this search<sup>9</sup>. Systematic reviews  
38 were included where primary research is available.  
39  
40  
41

42 This generated 7323 items. A significant proportion of work in the area of nurse  
43 staffing has taken the form of editorials and various types of commentary or opinion  
44 pieces rather than empirical studies. After elimination of opinion pieces and  
45 professional non peer reviewed literature there remained in excess of 700 papers  
46 (n=769) across the different disciplines. These were reviewed and have broadly  
47 been themed to gain insight into the different approaches and relational research  
48 used to examine the issue of staffing within a wider context of safety.  
49  
50  
51  
52  
53  
54  
55  
56  
57  
58  
59  
60

## Ethical Considerations

This is a review of the literature. Ethical permission was not sought.

## Patient and Public Involvement

There was no patient and public involvement in this review.

## Results

In terms of analysis specific themes started to emerge which were anchored around methodology and different lens through which the issue of nurse staffing is seen. Approaches to the question framed as “how many do we need?” are commonly approached as units, for example, numbers of workforce, ratios (nurse to patient or nurse to furniture) unit/ward levels of activity, job (different types of nursing such as paediatric, theatres or intensive care) or contextually/situationally. It is interesting to note that some situational perspectives originated from systems engineering approaches such as Caryaon & Gurses<sup>11</sup> and their systems engineering approach in intensive care units.

After examining the literature iteratively a number of themes emerge. Any of these themes would merit study in their own right but a broad overview of the different approaches and their application is given here. What is striking is the range of approaches used. These range from descriptive studies to the development of operational mathematical models.

### **Nursing as units, workload or activity.**

The literature on the development of a ratio or the effect of nurse to patient ratios is a common theme in the nursing. A meta-analysis by Driscoll<sup>12</sup> draws on 35 studies which show an association between nurse staffing ratios and patient outcomes. These studies use large administrative data sets and found that higher staffing levels were associated with reduced mortality, reduced medication errors, reduction in incidence of pressure ulcers, reduced use of restraint, reduction in infections such as hospital acquired pneumonia, higher aspirin use and a greater number of patients receiving treatment. It is interesting to note that all of these studies are either cross sectional or point prevalence studies. When examining this section of the literature, cross sectional studies dominate.

Shindul-Rothschild et al<sup>13</sup> notes how workload impacts on efficiency in emergency departments. Using regression in trauma centres, the time to a diagnostic evaluation significantly increased when nurses care for a higher number of patients. Aikens

1  
2  
3 work on RN 4Cast<sup>14</sup> shows that an increase in a nurses' workload by one patient  
4 increased the likelihood of an inpatient dying within 30 days of admission by 7% and  
5 every 10% increase in bachelor's degree nurses was associated with a decrease in  
6 this likelihood by 7%. These associations imply that patients in hospitals in which  
7 60% of nurses had bachelor's degrees and nurses cared for an average of six  
8 patients would have almost 30% lower mortality than patients in hospitals in which  
9 only 30% of nurses had bachelor's degrees and nurses cared for an average of eight  
10 patients. Skillmix is also a feature of this body of work. Graduate RNs are associated  
11 with better outcomes while higher registered nurse to patient ratios or support worker  
12 to registered nurse ratios are associated with poorer outcomes<sup>15</sup>. Diane Boyle's  
13 study<sup>16</sup> found that higher Registered Nurse Hours Per Patient Day (RNHPPD) was  
14 associated with improvements in total fall rates over time. This finding was not  
15 unique with various studies exposing the same association for example Staggs and  
16 Dunton<sup>17</sup> found that skillmix of a higher rate of assistive personnel was associated  
17 with an increase in falls but there was variation. On acute medical units there was a  
18 weak association between decrease in falls and increase in RN staffing, but in step  
19 down and medical units the authors concluded that increasing non RN staffing was  
20 ineffective for decreasing falls. Increasing RN staffing did have a positive impact but  
21 this varied by unit type. White et al<sup>18</sup> in another cross-sectional study (N=353,333)  
22 examined a historical dataset using thirty-day mortality and failure to rescue as  
23 endpoints and found that each 10% increase in the proportion of graduate nurses  
24 was associated with 4% lower odds of death in the older population 10% lower odds  
25 of death for those with dementia. This was associated with better odds of rescue  
26 where graduate nurses are deployed.

27  
28 Relationships between staffing factors and outcomes are complex<sup>19,20,21</sup> as the  
29 causal relationship is not fully understood. However we know from other studies that  
30 there is a deficit in care. For example, in a study by Ball et al<sup>22</sup> nurses (86%)  
31 reported that one or more care activity had been left undone due to lack of time on  
32 their last shift. Most care frequently left undone were: comforting or talking with  
33 patients (66%), educating patients (52%) and developing/updating nursing care  
34 plans (47%). The odds of care being left undone halved when nurses had six or less  
35 patients to care for. The work left undone has become a more specific area of  
36 enquiry with more authors coming to essentially the same conclusions<sup>23</sup>. Missed  
37 care appears to be common and perhaps even predictable. The work of Bragadottir  
38 et al<sup>24</sup> examined the correlates and predictors of missed nursing care in hospitals  
39 using regression. Such approaches may contribute to future demand based models.

40  
41 A substantial body of evidence has been built which uses the approach of nurses,  
42 nursing care or patients as units of work activity.

43  
44 Many factors contribute to workload and the relationship with safety is frequently  
45 investigated. Adequate staffing and resources, administrative support, and  
46 collaborative workplace relationships have been shown to improve patient safety,  
47  
48  
49  
50  
51



1  
2  
3 and factors such as low job satisfaction, staff turnover, and high workload increase  
4 risk to patient safety<sup>25,26</sup>.

5  
6 Nursing workload is subjected to “measurement” using a plethora of measurement  
7 tools which numerate tasks. Most of these tools tend to view nursing workload as  
8 countable tasks, which is likely to be an oversimplification of complex work. Such  
9 tools do not recognise the ‘other’ work which nurses do related to workplace culture  
10 and climate<sup>27</sup>. Fasoli & Haddock<sup>28</sup> after an extensive review of nurse workload  
11 classification systems, reported there was no gold standard system for doing this  
12 and current measures were not sensitive enough. This is reflected in findings that the  
13 data collected routinely by nurses is not of sufficient quality to perform such complex  
14 modelling<sup>17,29,30</sup>.

15  
16  
17  
18 There has been a preoccupation with “time and motion” studies but these are of  
19 limited use in complex work<sup>31,32</sup> as a result this method cannot handle relational  
20 work<sup>33</sup> and is therefore likely to underestimate nursing workload.

21  
22  
23 There are measures which consider the complexity of the work<sup>34</sup> and workload  
24 emerged as a theme including systematic reviews of the effect of workload on  
25 patient safety<sup>35,11</sup>. Several inductive subgroups emerged including the role of  
26 workload and subsequent delegation of tasks which leads to delegation of safety  
27 critical activity such as vital signs monitoring for example how local modifications to  
28 track and trigger systems can reduce accuracy the of predictive algorithms<sup>36</sup> or the  
29 workplace environment as a factor of workload<sup>37</sup>.

30  
31  
32 There has been some examination of redistribution of workload<sup>38</sup> in which there has  
33 been some measurable increase in clinical time by workload redistribution. Although  
34 this review does not consider the costs of staffing there are some interesting papers  
35 on this. Perhaps one of the most interesting is Newbold’s 2008 model<sup>39</sup> which used  
36 Aiken’s 2003<sup>40</sup> study, looked at nurse levels of education and patient mortality in  
37 terms of a trade-off: what would a cost/mortality look like. Other researchers have  
38 also utilised the cross sectional work to iterate mathematical models with some  
39 success.  
40  
41  
42  
43  
44

## 45 **Workforce**

46  
47 Levels of workforce skill and education also feature in the literature. Much of the  
48 work linking staffing (units or education) to outcomes looks at specific aspects of  
49 care or harm. Boyle et al<sup>16</sup> found an association between speciality nursing  
50 education (post registration certification) and improvement in the rates of falls using  
51 a longitudinal model (903 hospitals over 6 years) which echoed the findings of  
52 Kendall-Gallagher & Blegen<sup>41</sup>, Lange et al<sup>42</sup> and Boltz et al<sup>43</sup>. For example, the Lang  
53 paper found that units staffed with two or more geriatric-certified nurses had  
54 significantly lower fall rates than units with one or no geriatric-certified nurses<sup>42</sup>.  
55  
56  
57  
58  
59  
60

1  
2  
3 There appears to be a body of evidence supporting a higher skilled educated  
4 workforce as associated with less harm although it is interesting to note that Magnet  
5 hospitals were associated with higher rates of falls<sup>44</sup>. There are numerous papers  
6 linking RN staffing with patient outcomes/harm but fewer on education. One  
7 interesting single centre study looked at the consequences of outlying patients to  
8 non-specialist wards which was associated with an increase in mortality<sup>45</sup>.

9  
10  
11 In a recent systematic review<sup>46</sup> eighteen studies were examined which gave  
12 subjective reports of missed care. 75% or more nurses reported omitting some care.  
13 Fourteen of these studies found low nurse staffing levels were significantly  
14 associated with higher reports of missed care. There was little evidence that adding  
15 support workers to the team reduced this. The authors note that the extent to which  
16 the relationships observed link to outcomes has yet to be investigated.

17  
18  
19 Other work suggests that adding assistive nursing personnel without professional  
20 nurse qualifications may contribute to preventable deaths, erode quality and safety of  
21 hospital care<sup>14</sup>. Where studies have explored the impact of second level nurses,  
22 similar to enrolled nurse qualification, the evidence is not supportive of the role<sup>47</sup>.

23  
24  
25 Satisfaction with work and other factors such as environmental, workload, working  
26 hours and effect of skill mix. In some cases there is evidence of an association  
27 between shift length, staff satisfaction and patient outcomes<sup>48</sup> which associated  
28 longer shifts with more care left undone. These studies usually take the form of cross  
29 sectional surveys as there appears to be no routine data collection of these data.  
30 Unlike the concepts of staffing, there is much more consistency in the reporting of  
31 issues related to workload such as moral distress, burn out and compromise of both  
32 personal and professional values including the erosion of identity<sup>49</sup>. The corollary of  
33 this also occurs in that papers describing moral distress also cite inadequate staffing  
34 as a causative attribute<sup>50</sup>.

35  
36  
37  
38 Staffing and turnover is also occasionally reported in terms of outcomes for example  
39 turnover and patient outcomes. In 2014 Park et al<sup>51</sup> examined episodic unit-level  
40 data from 2008 to 2010. This study examined 10,935 unit-quarter observations  
41 (2,294 units, 465 hospitals) using multilevel regression. They found that the effect of  
42 RN turnover on unit-acquired pressure ulcers was significant and “lagged” in terms of  
43 time. For every 10 percentage-point increase in RN turnover in a quarter, the odds of  
44 a patient having a pressure ulcer increased by 4 percent in the next quarter. Higher  
45 RN turnover in a quarter was associated with lower RN staffing in the current and  
46 subsequent quarters. Higher RN staffing was associated with lower pressure ulcer  
47 rates, but it did not mediate the relationship between turnover and pressure ulcers.

48  
49  
50  
51 There appears to be a growing body of literature which examines resilience. The  
52 emotional labour of nursing involves managing the emotional demands of nursing  
53 work. An integrative review by Delgado et al<sup>26</sup> identifies the difficult nature of not only  
54 the work but the opportunities to build personal resilience.

1  
2  
3 Alves et al<sup>52</sup> found that RNs nurses with greater autonomy, good working  
4 relationships and control over their work environment had lower levels of emotional  
5 exhaustion, higher job satisfaction, less intention of leaving. Although they do not  
6 associate findings with patient outcomes these and other authors do find positive  
7 associations with autonomy and rescue rates and mortality-and they are more likely  
8 to experience this in small and non-teaching hospitals<sup>53</sup>. This a consistent theme in  
9 the literature reflected in a scoping review of twelve studies<sup>54</sup> which concludes that  
10 structural empowerment effects the quality of care and patient safety in hospital. This  
11 is also reflected in perceptions of safety culture and outcomes. When adequate  
12 resource is allocated in terms of staffing the perception of safety and patient  
13 satisfaction improves<sup>55</sup>.

### 19 **Understanding the complex relationship**

21 There were a number of studies that used various aspects of data science. These  
22 ranged from Bayesian approaches<sup>56</sup>, to systems thinking, modelling, computational  
23 mathematics and approaches such as machine learning. Many of these papers  
24 appeared outside of the nursing literature and were located via databases that serve  
25 the physical sciences, engineering and mathematics.

28 This includes work such as Aickelin et al<sup>57</sup> who developed a memetic evolutionary  
29 algorithm to achieve explicit learning in rule-based nurse rostering, which involves  
30 applying a set of heuristic rules for each nurse's assignment. This uses a set of  
31 building blocks in terms of data and rules to build an Estimation of Distribution  
32 Algorithm (EDA). As the authors point out, although this performs well in some "real  
33 world" situations it is limited by its ability to learn-one of the solutions is to add more  
34 nurses to the model without understanding that this might be a constraint.

38 Pitkaaho et al<sup>58</sup> used Finnish data from over 35,000 episodes of care to determine  
39 relationships between nurse staffing and patients' length of stay in acute care units  
40 and to determine whether non-linear relationships exist between variables using a  
41 Bayesian approach. They found that acuity was the overriding factor that connected  
42 all eleven variables in the dependency network of nurse staffing and short length of  
43 stay. Non-linear associations were found between short length of stay and the  
44 proportion of RNs. Skill mix consisting of an average proportion of Registered  
45 Nurses (65–80%) was conducive to a short length of stay and predicted a 66%  
46 likelihood of short length of stay. Lower percentages of RN predicted lower likelihood  
47 of short length of stay.

51 An overriding theme in these approaches are challenges in the real world. Well-  
52 constructed approaches to calculating staffing needing more work than authors  
53 anticipated when tested in reality. This is not unusual-these approaches tend to be  
54 iterative, however it is interesting to note that a number of these approaches

1  
2  
3 concluded that previous staffing models had underestimated ratios and staffing  
4 requirements in areas examined such as recovery<sup>59</sup>.

5  
6 Other authors such as Park<sup>60</sup> are now building more optimized models based on  
7 operational mathematical approaches and are likely to yield a more comprehensive  
8 approach to the problem of computing staffing and outcomes as they accommodate  
9 complexity.

10  
11 Data science approaches were the only ones to consider knowledge stock or  
12 knowledge flow in the early part of the 21<sup>st</sup> century but little consideration was given  
13 to this after this time<sup>61</sup>.

14  
15 The advent of data science offers many opportunities however nursing may not be  
16 placed to capitalise on them<sup>62</sup>. Lack of high quality data is a recurring issue in terms  
17 of both unit based approaches and approaches using data science to examine  
18 complexity. Nursing data is generally episodic and lacks sensitivity to the activity that  
19 nurses perform. In the studies, most informatics systems use taxonomies or lists of  
20 tasks which are limited and show no apparent relationship with time taken. Another  
21 issue is the dominance of supply side (nurse units of time for example) and not the  
22 demand from patients which is rarely looked at.  
23  
24  
25  
26  
27  
28

### 29 **Refining and leaving the hermeneutic circle**

30  
31 A key facet of Gadamer's<sup>8</sup> approach is not to leave the hermeneutic circle due to its  
32 inescapability and as such the review has focussed on the search. However the  
33 author is from a positivist paradigm and so has broken the circle at this juncture. This  
34 method is an inductive one and as such recognises that the iterations of searching  
35 and analysis could be infinite. The themes that emerge here across the literature are  
36 not exhaustive but provide a break in the cycle of searching and analysis. The  
37 exploration of these themes can be further built up. The papers reviewed offered  
38 many directions in which to expand this area of enquiry and these are shown in  
39 Figure 2.  
40  
41  
42

43 *Insert Figure 2 here*

### 44 **Discussion**

45  
46 Although the evidence in the nursing literature appears to offer no firm guidance on  
47 staffing models or absolute solutions, this could be seen as reassurance because it  
48 also demonstrates the complexity of the problem. The literature describes different  
49 associations between various factors such as outcomes and staffing numbers/skill  
50 mix. Each piece of work gives a slightly different perspective but an overarching  
51  
52  
53  
54  
55  
56  
57  
58  
59  
60

1  
2  
3 emerging theme is that a relationship does exist between different factors even if  
4 these relationships are not fully understood, there is an apparent effect.  
5

6 The conceptual difficulty safety presented in the context of staffing was an emerging  
7 theme. How is safe differentiated from unsafe, what is optimal staffing and where  
8 should trade off occur. These studies help with clarification of the problem but there  
9 is little consistency in this body of work in terms of a solution.  
10

11 One of the themes herein was the repeated association with not only numbers of  
12 RNs but the educational level in the workplace. This appeared to show an overall  
13 benefit in employing RNs and also RNs with a degree level qualification. Some  
14 authors note this in the employment marketplace-that employers are acting on these  
15 findings and recording a downward trend in using assistive roles in the USA<sup>63</sup>.  
16  
17

18 It is interesting that only one paper mentioned knowledge stock and knowledge flow.  
19 None of the papers reviewed examined nurse staffing in terms of being a knowledge  
20 intense occupation which is a factor in modelling workforces in other safety critical  
21 industries or in other fields where operations are highly reliant on professional  
22 knowledge such information technology<sup>64</sup>. This might be because the approach to  
23 workforce modelling in nursing is focussed on linear, deterministic approaches such  
24 as time and motion or time filled with tasks. This is more akin to workforce modelling  
25 in the service industries<sup>65</sup>.  
26  
27  
28

29 There is narrative which focusses on a fixed ratio as staffing model in nursing. Ratios  
30 are common in other safety critical industries or area such as mass gatherings  
31 however it is often used as a failsafe rather than a staffing model<sup>66</sup> which might be a  
32 more practical option for nursing.  
33  
34

35 The literature is supportive of a relationship between staffing, skillmix and education  
36 and this has been reviewed before<sup>67</sup> however circling out beyond the nursing  
37 literature affirms this. Many reviews or policy documents appear to be confined to the  
38 nursing or medical literature and yet a rich seam of enquiry appears outside of these  
39 fields. What is striking is that there was very little overlap in areas of enquiry such as  
40 safety critical operations research, demand modelling or knowledge based workforce  
41 research and acute nurse staffing (Figure 2). Researchers should widen their  
42 perspectives on methodologies and approaches to include other disciplines  
43 particularly the approaches of safety critical industries. By doing so it is possible to  
44 iterate an initial understanding of demand which can begin to integrate areas such as  
45 workforce and safety- an interpretation is given in Figure 3.  
46  
47  
48  
49

50 ***Insert Figure 3 here***  
51  
52  
53  
54  
55  
56  
57  
58  
59  
60

## Conclusion

There is a wide variety of literature from different paradigms that support a complex interrelationship between different factors in acute nurse staffing. Despite a growing body of knowledge, there appears to be little reference to nursing as safety critical nor is the problem viewed through this lens.

## Key Points for practice

- The issue of nurse staffing is a complex one and the relationships between factors such as nursing and patient outcomes is also complex. Despite this no papers examined nursing as a knowledge intensive operation or as a safety critical workforce.
- There is an increasing body of knowledge outside of nursing which has focussed on this topic but is rarely utilised.
- Although this is an emerging area, evidence repeatedly suggested a complex interdependent relationship between nurse staffing and various factors such as patient safety.
- Given the asserted complexity of work, time and motion or other simplistic activity analysis (measuring nursing in a linear or deterministic way) should be avoided.
- The importance of this emerging relationship should be considered when examining staffing.

## Contributor Statement

AL contributed to design, analysis and writing. GP contributed to analysis and writing.

## Competing interests

There are no competing interests.

## Funding Statement

This research received no specific grant from any funding agency in the public, commercial or not-for-profit sectors.

## Data Sharing Statement

The data is in the public domain.

## Acknowledgements

The authors would like to acknowledge Dr M Alexander for help in identifying cases from the coroner. Dr Elaine Maxwell for help in formulating the area of enquiry.

## References

1. Francis R (2013) The Mid Staffordshire NHS Foundation Trust Public Inquiry. Report of the Mid Staffordshire NHS Foundation Trust Public Inquiry: Executive Summary. London: Stationery Office.
2. NHS Digital (2017) Nurse & health visitor-numbers September 2012 to 2017 <https://digital.nhs.uk/article/8471/Nurse-health-visitor-numbers-September-2012-to-2017> Accessed February 2018
3. Ministry of Justice (2013) *Coroners & Justice Act 2009; Coroners (Investigation) Regulations 2013 Regulation 28: report to prevent future deaths* HM Government
4. Office of the Coroner, District of Hertfordshire (2013). *Section 28 and Letter in the case of John Gwynfryn MORRIS, deceased* <https://www.judiciary.gov.uk/wp-content/uploads/JCO/Documents/coroners/pfds/care-home/Morris+2013-0295.pdf> Accessed March 2018
5. Health Education England (2015) Raising the Bar Shape of Caring: A Review of the Future Education and Training of Registered Nurses and Care Assistants <https://www.hee.nhs.uk/sites/default/files/documents/2348-Shape-of-caring-review-FINAL.pdf> Accessed March 2018
6. Berkow, S; Vonderhaar K, Stewart J, Virkstis K Terry A (2014) Analyzing Staffing Trade-Offs on Acute Care Hospital Units *Journal of Nursing Administration: October 2014 - Volume 44 - Issue 10 - p 507–516*
7. Welsh Government (2015). Nurse Staffing Levels Act 2016. Cardiff: HM Welsh Government
8. Gadamer, H.G., (1975) *Truth and method*. Seabury, New York
9. Boell SK, Cecez-Kecmanovic D (2014) A hermeneutic approach for conducting literature reviews and literature searches. *CAIS*, Volume 34, Article 12, pp. 257-286, January 2014.
10. Moher D, Liberati A, Tetzlaff J, Altman DG, The PRISMA Group (2009). Preferred Reporting Items for Systematic Reviews and Meta-Analyses: The PRISMA Statement. *PLoS Med* 6(7): e1000097. doi:10.1371/journal.pmed1000097
11. Carayon P, Gurses A (2005) Nursing workload and patient safety in intensive care units: a human factors engineering evaluation of the literature. *Intensive Crit Care Nurs.* 2005;21:284–301.
12. Driscoll, A Grant, M, Carroll, D, Dalton, S, Deaton, C, Jones, I, Lehwaldt, D, McKee, G Munyombwe, T, Astin, F (2017) The effect of nurse-to-patient ratios

- 1  
2  
3 on nurse-sensitive patient outcomes in acute specialist units: a systematic  
4 review and meta-analysis *European Journal of Cardiovascular Nursing*  
5 Volume: 17 issue: 1, page(s): 6-22  
6  
7 13. Shindul-Rothschild J Read CY Stamp KD Flanagan J (2016) Nurse Staffing  
8 and Hospital Characteristics Predictive of Time to Diagnostic Evaluation for  
9 Patients in the Emergency Department *Journal of Emergency Nursing* Volume  
10 43, Issue 2, Pages 138–144  
11  
12 14. Aiken LH, Sloane D, Griffiths P, et al (2016) Nursing skill mix in European  
13 hospitals: cross-sectional study of the association with mortality, patient  
14 ratings, and quality of care *BMJ Qual Safety* Published Online First: 15  
15 November 2016. doi: 10.1136/bmjqs-2016-005567  
16  
17 15. Griffiths P, Ball J, Murrells T, et al (2016) Registered nurse, healthcare  
18 support worker, medical staffing levels and mortality in English hospital trusts:  
19 a cross-sectional study *BMJ Open* 2016;6:e008751. doi: 10.1136/bmjopen-  
20 2015-008751  
21  
22 16. Boyle DK, Cramer E, Potter C et al (2015). Longitudinal association of  
23 registered nurse national nursing specialty certification and patient falls in  
24 acute care hospitals. *Nurs Res* 2015;64:291–9.  
25  
26 17. Staggs VS E Dunton N (2013) Associations between rates of unassisted  
27 inpatient falls and levels of registered and non-registered nurse staffing  
28 *International Journal for Quality in Health Care*, Volume 26, Issue 1, 1  
29 February 2014, Pages 87–92  
30  
31 18. White, E. M., Smith, J. G., Trotta, R. L. and McHugh, M. D. (2018), Lower  
32 Postsurgical Mortality for Individuals with Dementia with Better-Educated  
33 Hospital Workforce. *J Am Geriatr Soc*. doi:10.1111/jgs.15355  
34  
35 19. Ebright P Patterson ES, Chalko BA, Render ML (2003) Understanding the  
36 complexity of registered nurse work in acute care settings. *Journal of Nursing*  
37 *Administration* 2003 Dec;33(12):630-8  
38  
39 20. Leary A, Cook R, Jones S, Smith J, Gough M, Maxwell E, Punshon G,  
40 Radford M (2016) Mining routinely collected acute data to reveal non-linear  
41 relationships between nurse staffing levels and outcomes. *BMJ Open*  
42 6(12),e011177  
43  
44 21. Huber E., Kleinknecht-Dolf M., Müller M., Kugler C. & Spirig R. (2017) Mixed-  
45 method research protocol: defining and operationalizing patient-related  
46 complexity of nursing care in acute care hospitals. *Journal of Advanced*  
47 *Nursing* 73(6), 1491–1501. doi: 10.1111/jan.13218  
48  
49 22. Ball J, Murrells T, Rafferty AM, Morrow E, Griffiths P (2014) Care left undone'  
50 during nursing shifts: associations with workload and perceived quality of care  
51 *BMJ Qual Safety* 2014 Feb;23(2):116-25  
52  
53 23. Recio-Saucedo A, Dall'Ora C, Maruotti A, et al. What impact does nursing  
54 care left undone have on patient outcomes? Review of the literature. *J Clin*  
55 *Nurs*. 2017 Aug 31; [Epub ahead of print]  
56  
57  
58  
59  
60



- 1  
2  
3 24. Bragadóttir, H., Kalisch, B. J. and Tryggvadóttir, G. B. (2017), Correlates and  
4 predictors of missed nursing care in hospitals. *J Clin Nurs*, 26: 1524-1534.  
5 doi:10.1111/jocn.13449  
6  
7 25. Hui-Ying Chiang, H., Hsiao, Y., and Lee, H (2017) Predictors of hospital  
8 nurses' safety practices, work environment, workload, job satisfaction, and  
9 error reporting. *Journal of Nursing Care Quality*. 2017; 32: 359–368  
10  
11 26. Delgado, C., Upton, D., Ranse, K., Furness, T., and Foster, K. (2017) Nurses'  
12 resilience and the emotional labour of nursing work: an integrative review of  
13 empirical literature. *International Journal of Nursing Studies*. 2017; 70: 71–88  
14  
15 27. Ross, C Rogers C (2017) RN? Registered or rubber nurse? *Collegian*,  
16 Volume 24, Issue 6, 551 - 555  
17  
18 28. Fasoli, D.R., Fincke, B., & Haddock, K.S. (2011). Going beyond patient  
19 classification systems to create an evidence based staffing methodology.  
20 *Journal of Nursing Administration*, 41(10), 434-439  
21  
22 29. Leary A, Tomai B, Swift A, Woodward A, Hurst K (2017) Nurse staffing levels  
23 and outcomes - mining the UK national data sets for insight. *Int J Health Care*  
24 *Qual Assur*. 2017 Apr 18;30(3):235-247. doi: 10.1108/IJHCQA-08-2016-0118.  
25  
26 30. Keenan GM, Lopez KD, Sousa VEC, Stifter J, Macieira TGR, Boyd AD, Yao  
27 Y, Herdman TH, Moorhead S, McDaniel A, Wilkie DJ (2018) A Shovel-Ready  
28 Solution to Fill the Nursing Data Gap in the Interdisciplinary Clinical Picture *Int*  
29 *J Nurs Knowl*. 2018 Jan;29(1):49-58. doi: 10.1111/2047-3095.12168. Epub  
30 2017 Jan 16. PMID: 28093877  
31  
32 31. De Leon E. *Industrial psychology*. London: Rex Publishing, 1993  
33  
34 32. Raiborn CA (2004). *Managerial accounting*. Melbourne, Australia: Nelson  
35 Thomson Learning, 2004  
36  
37 33. Malloch K (2015) Measurement of Nursing's Complex Health Care Work:  
38 Evolution of the Science For Determining the Required Staffing For Safe and  
39 Effective Patient Care July 2015 *Nursing economics* 33(1):20-25  
40  
41 34. Junttila, J.K., Koivu, A., Fagerström, L., Haatainen, K., and Nykänen, P.  
42 Hospital mortality and optimality of nursing workload: a study on the predictive  
43 validity of the RAFAELA nursing intensity and staffing system. *International*  
44 *Journal of Nursing Studies*. 2016; 60: 46–53  
45  
46 35. Lang TA, Hodge M, Olson V, et al. Nurse-patient ratios: a systematic review  
47 on the effects of nurse staffing on patient, nurse employee, and hospital  
48 outcomes. *J Nurs Adm*. 2004;34(7–8):326–37.  
49  
50 36. McGaughey J, O'Halloran P, Porter S, Trinder J, Blackwood B (2017). Early  
51 warning systems and rapid response to the deteriorating patient in hospital: A  
52 realist evaluation. *J Adv Nurs*. 2017;73:3119–3132.  
53  
54 37. Simon M, Maben J, Murrells T, Griffiths P. (2016) 'Is single room hospital  
55 accommodation associated with differences in healthcare-associated  
56 infection, falls, pressure ulcers or medication errors? A natural experiment  
57 with non-equivalent controls'. *SAGE Journal of Health Services Research and*  
58 *Policy*, 21 (3), pp. 147-155.  
59  
60

- 1  
2  
3 38. Hamilton J, Verrall T, Maben J, Griffiths P, Avis K, Baker G, Teare G. (2014)  
4 'One size does not fit all: a qualitative content analysis of the importance of  
5 existing quality improvement capacity in the implementation of Releasing  
6 Time to Care: the Productive Ward™ in Saskatchewan, Canada'. *BMC BMC*  
7 *Health Services Research*, 14  
8  
9 39. Newbold D. (2008) The production economics of nursing: a discussion paper.  
10 *International Journal of Nursing Studies* 45(1), 120–128.  
11  
12 40. Aiken, L.H. Clarke, SP Cheung, RB Sloane, DM Silber JH (2003) Education  
13 levels of hospital nurses and patient mortality *Journal of the American Medical*  
14 *Association*, 290 (2003), pp. 1617-1623  
15  
16 41. Kendall-Gallagher D., Blegen M. A. (2009). Competence and certification of  
17 registered nurses and safety of patients in intensive care units. *American*  
18 *Journal of Critical Care*, 18, 106– 113. doi:10.4037/ajcc2009487  
19  
20 42. Lange J., Wallace M., Gerard S., Lovanio K., Fausty N., Rychlewicz S. (2009).  
21 Effect of an acute care geriatric educational program on fall rates and nurse  
22 work satisfaction. *Journal of Continuing Education in Nursing*, 40, 371– 379.  
23  
24 43. Boltz M., Capezuti E., Wagner L., Rosenberg M. C., Secic M. (2013). Patient  
25 safety in medical-surgical units: Can nurse certification make a difference?  
26 *Medsurg Nursing*, 22, 26– 32, 37  
27  
28 44. Boyle D. K., Gajewski B. J., Miller P. A. (2012). A longitudinal analysis of  
29 nursing specialty certification by Magnet® status and patient unit type. *The*  
30 *Journal of Nursing Administration*, 42, 567– 573.  
31  
32 45. Bai AD, Srivastava S, Tomlinson GA, et al (2018) Mortality of hospitalised  
33 internal medicine patients bedspaced to non-internal medicine inpatient units:  
34 retrospective cohort study *BMJ Qual Saf* 2018;27:11-20.  
35  
36 46. Griffiths, P., Recio-Saucedo, A., Dall'Ora, C., Briggs, J., Maruotti, A.,  
37 Meredith, P., Smith, G. B., Ball, J. and The Missed Care Study Group (2018),  
38 The association between nurse staffing and omissions in nursing care: a  
39 systematic review. *J Adv Nurs*. Accepted Author Manuscript.  
40 doi:10.1111/jan.13564  
41  
42 47. NNRU (2009) *Policy Plus: Is there a case for the UK nursing workforce to*  
43 *include grades of qualified nurse other than the registered nurse?* National  
44 Nursing Research Unit, Kings College London.  
45 [http://www.kcl.ac.uk/nursing/research/nuru/policy/Policy-Plus-Issues-by-](http://www.kcl.ac.uk/nursing/research/nuru/policy/Policy-Plus-Issues-by-Theme/Whodeliversnursingcare(roles)/PolicyIssue21.pdf)  
46 [Theme/Whodeliversnursingcare\(roles\)/PolicyIssue21.pdf](http://www.kcl.ac.uk/nursing/research/nuru/policy/Policy-Plus-Issues-by-Theme/Whodeliversnursingcare(roles)/PolicyIssue21.pdf) accessed March  
47 2018  
48  
49 48. Ball J, Day T, Murrells T, Dall'Ora C, Rafferty A, Griffiths P, Maben J. (2017)  
50 'Cross-sectional examination of the association between shift length and  
51 hospital nurses job satisfaction and nurse reported quality measures'. *BioMed*  
52 *Central BMC Nursing*, 16 (26) doi: 10.1186/s12912-017-0221-7  
53  
54 49. Maben J, Latter S, Clark JM (2007) The sustainability of ideals, values and  
55 the nursing mandate *Nursing Inquiry* 2007 (14) 99-113  
56  
57 50. Traynor M (2014) Caring after Francis: moral failure in nursing reconsidered  
58 *Journal of Research in Nursing* Volume: 19 issue: 7-8, page(s): 546-556  
59  
60

- 1  
2  
3 51. Park, S H, Boyle, D K, Bergquist-Beringer, S, Staggs, V S, Dunton, N E.  
4 Concurrent and Lagged Effects of Registered Nurse Turnover and Staffing on  
5 Unit-Acquired Pressure Ulcers. *Health Serv Res.* 2014 Aug; 49(4): 1205–  
6 1225.  
7
- 8 52. Alves D.F.D.S., Silva D.D & Guirardello E.D.B. (2017) Nursing practice  
9 environment, job outcomes and safety climate: a structural equation modelling  
10 analysis *Journal of Nursing Management* 25, 46–55.  
11
- 12 53. van Oostveen C, Vermeulen H (2017) Greater nurse autonomy associated  
13 with lower mortality and failure to rescue rates *Evidence-Based Nursing*  
14 2017;20:56.  
15
- 16 54. Goedhart N.S., Van Oostveen C.J., Vermeulen H. (2017) The effect of  
17 structural empowerment of nurses on quality outcomes in hospitals: a scoping  
18 review *Journal of Nursing Management* 25, 194–206  
19
- 20 55. Smith, S. A., Yount, N., & Sorra, J. (2017). Exploring relationships between  
21 hospital patient safety culture and Consumer Reports safety scores. *BMC*  
22 *Health Services Research*, 17, 143. <http://doi.org/10.1186/s12913-017-2078-6>  
23
- 24 56. Li J and Aickelin U (2006): '*Bayesian Optimisation Algorithm for Nurse*  
25 *Scheduling*', *Scalable Optimization via Probabilistic Modeling: From*  
26 *Algorithms to Applications Studies in Computational Intelligence*, edited by M  
27 Pelikan, K Sastry and E Cantú-Paz, Chapter 17, pp 315-332, Springer  
28
- 29 57. Aickelin, U., Burke, E. & Li, J. *J Oper Res Soc* (2007) 58: 1574.  
30 <https://doi.org/10.1057/palgrave.jors.2602308> Accessed September 2017  
31
- 32 58. Pitkääho T., Partanen P., Miettinen M. & Vehviläinen-Julkunen K. (2015) Non-  
33 linear relationships between nurse staffing and patients' length of stay in  
34 acute care units: Bayesian dependence modelling. *Journal of Advanced*  
35 *Nursing* 71(2), 458–473. doi: 10.1111/jan.12550  
36
- 37 59. Siddiqui S, Morse E, Levin S (2017) Evaluating nurse staffing levels in  
38 perianesthesia care units using discrete event simulation *Transactions in*  
39 *Healthcare Systems Engineering* 7:4, 215-223  
40
- 41 60. Park C.S.-Y. (2017) Optimizing staffing, quality, and cost in home healthcare  
42 nursing: theory synthesis. *Journal of Advanced Nursing* 73(8), 1838–1847  
43
- 44 61. Bordoloi SK Matsuo H (2001) Human resource planning in knowledge  
45 intensive operations—a model for learning with stochastic turnover *Eur Jnl of*  
46 *Operational Research* 130 (2001) 169-189  
47
- 48 62. Flatley Brennan, P Bakken, A (2015) Nursing Needs Big Data and Big Data  
49 Needs Nursing, *Journal of Nursing Scholarship* 2015 47:5 477-484  
50
- 51 63. Li, S., Pittman, P., Han, X. and Lowe, T. J. (2017), Nurse-Related Clinical  
52 Nonlicensed Personnel in U.S. Hospitals and Their Relationship with Nurse  
53 Staffing Levels. *Health Serv Res*, 52: 422-436. doi:10.1111/1475-6773.12655  
54
- 55 64. Miles I, Belousova V, Chichkanov N, (2017) "Knowledge intensive business  
56 services: ambiguities and continuities", *Foresight*, [https://doi.org/10.1108/FS-](https://doi.org/10.1108/FS-10-2017-0058)  
57 [10-2017-0058](https://doi.org/10.1108/FS-10-2017-0058)  
58  
59  
60

- 1  
2  
3 65. Grobler A, Zock A (2010) Supporting long term workforce planning with a  
4 dynamic aging chain model-a case study from the service industry *Human*  
5 *Resource Management* 49 (5) 829-848  
6  
7 66. SGSA (2007) *Guide to Safety in Sports Grounds* ISBN 9780117020740 TSO  
8 London  
9  
10 67. Needleman J (2016) Nursing skill mix and patient outcomes *BMJ Qual Safety*  
11 Published Online First: 30 December 2016. doi: 10.1136/bmjqs-2016-006197

## 12 **Figure Legends**

13  
14 **Figure 1:** The hermeneutic review (Boell & Cecez-Kecmanovic, 2014).

15  
16 **Figure 2:** The areas of enquiry and potential overlap with other interdisciplinary  
17 areas- the bordered area contains the literature reviewed.

18  
19 **Figure 3:** Contextualising the findings in terms of demand.  
20  
21  
22  
23  
24  
25  
26  
27  
28  
29  
30  
31  
32  
33  
34  
35  
36  
37  
38  
39  
40  
41  
42  
43  
44  
45  
46  
47  
48  
49  
50  
51  
52  
53  
54  
55  
56  
57  
58  
59  
60

1  
2  
3  
4  
5  
6  
7  
8  
9  
10  
11  
12  
13  
14  
15  
16  
17  
18  
19  
20  
21  
22  
23  
24  
25  
26  
27  
28  
29  
30  
31  
32  
33  
34  
35  
36  
37  
38  
39  
40  
41  
42  
43  
44  
45  
46  
47  
48  
49  
50  
51  
52  
53  
54  
55  
56  
57  
58  
59  
60

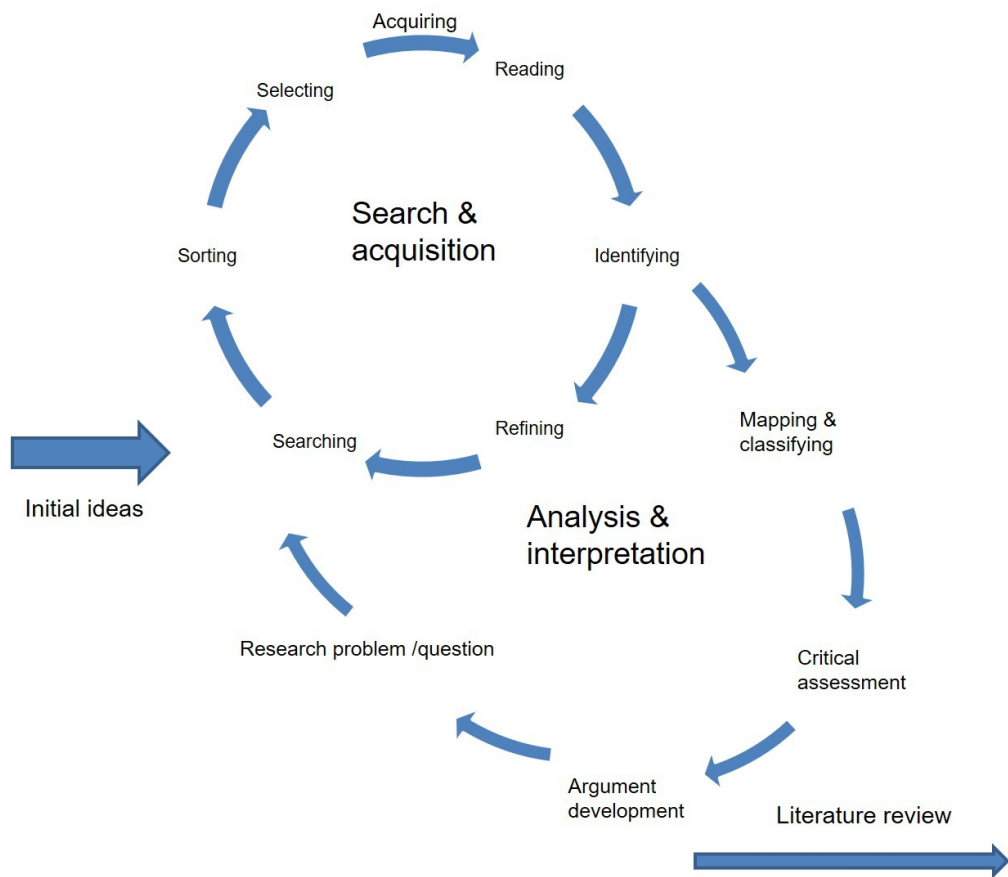

Figure 1

103x90mm (300 x 300 DPI)

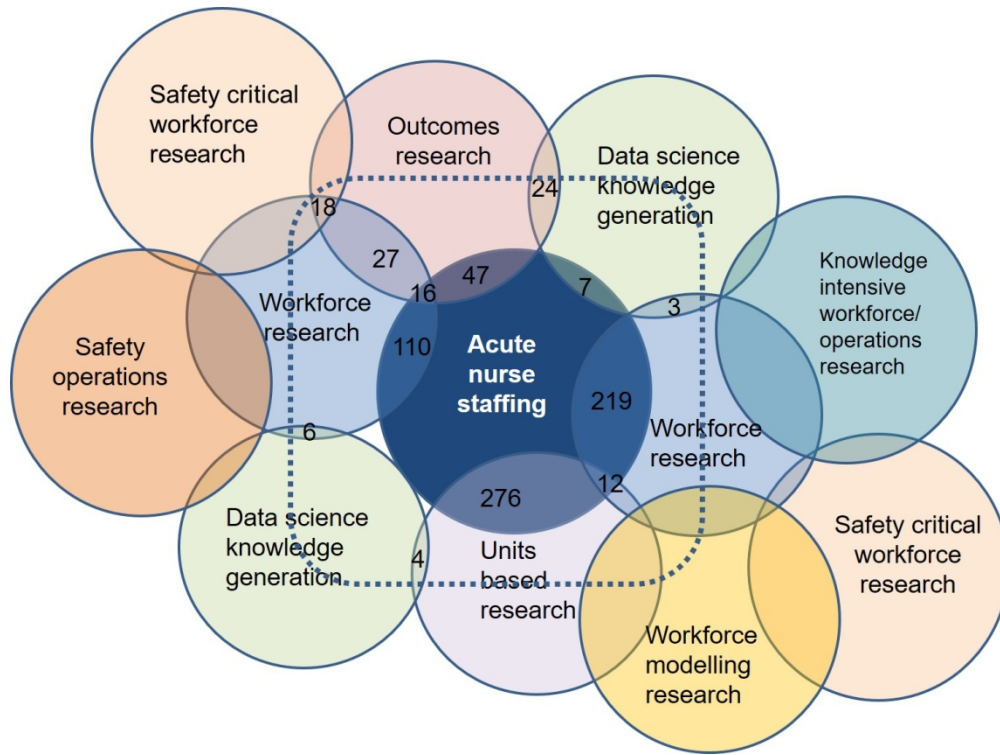

Figure 2

128x95mm (300 x 300 DPI)

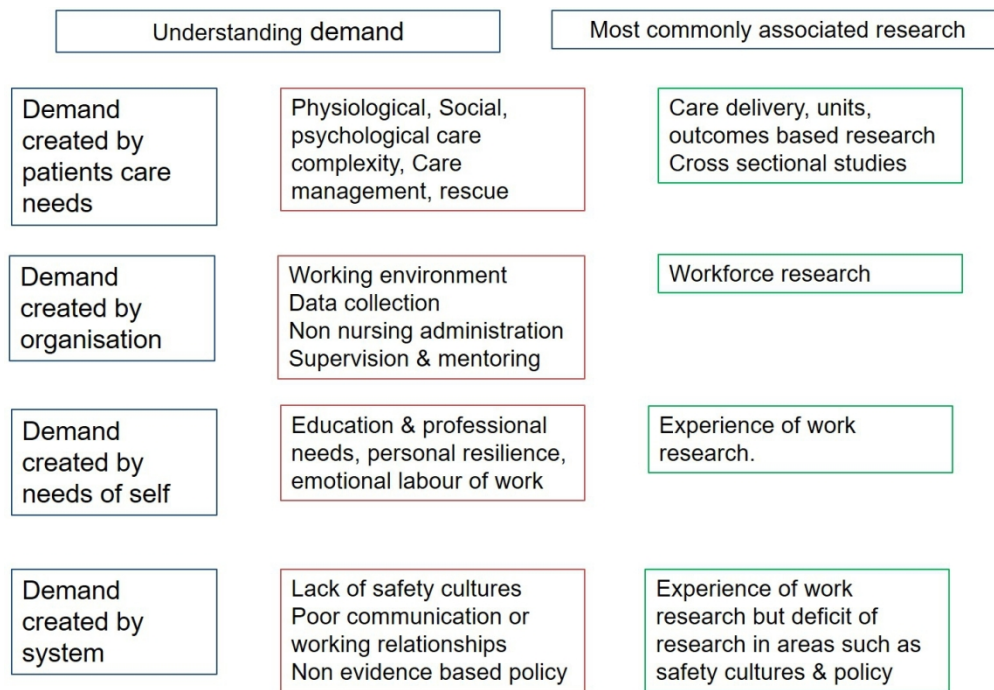

Figure 3

121x84mm (300 x 300 DPI)

# BMJ Open

## Determining acute nurse staffing, a hermeneutic review of an evolving science.

|                                 |                                                                                                 |
|---------------------------------|-------------------------------------------------------------------------------------------------|
| Journal:                        | <i>BMJ Open</i>                                                                                 |
| Manuscript ID                   | bmjopen-2018-025654.R1                                                                          |
| Article Type:                   | Research                                                                                        |
| Date Submitted by the Author:   | 21-Nov-2018                                                                                     |
| Complete List of Authors:       | Leary, Alison; London South Bank University<br>Punshon, Geoffrey; London South Bank University, |
| <b>Primary Subject Heading</b>: | Health services research                                                                        |
| Secondary Subject Heading:      | Nursing                                                                                         |
| Keywords:                       | Nursing, Staffing, Skillmix, Education, Safety, Modelling                                       |
|                                 |                                                                                                 |

SCHOLARONE™  
Manuscripts



1  
2  
3 **Title: Determining acute nurse staffing, a hermeneutic review of an evolving**  
4 **science.**  
5

6 ***Corresponding Author***  
7

8 ***Leary, Alison***  
9

10 Prof Alison Leary PhD RN  
11

12 London South Bank University  
13

14 School of Health & Social Care  
15

16 103 Borough Rd London SE1 0AA  
17

18 alisonleary@yahoo.com  
19  
20  
21  
22

23  
24 ***Punshon, Geoffrey***  
25

26 Dr Geoffrey Punshon PhD  
27

28 London South Bank University  
29

30 School of Health & Social Care  
31

32 103 Borough Rd London SE1 0AA  
33

34 punshongeoff@yahoo.co.uk  
35  
36  
37  
38

39 **Competing interests**  
40

41 **There are no competing interests. This review is unfunded.**  
42  
43  
44

45 **Key words**  
46

47 **Staffing, Safety, Nursing, Skillmix, education, modelling, hermeneutics**  
48  
49  
50

51 **Word count 4252**  
52  
53  
54  
55  
56  
57  
58  
59  
60

## Abstract

### Background

Calculating nurse staffing in the acute hospital has become a key issue but solutions appear distant. Community, mental health and areas such as learning disability nursing have attracted less attention and remain intractable. This review aims to examine current approaches to the issue across many disciplines.

### Design

The approach taken is iterative and in the form of a hermeneutic review. 769 pieces of evidence were reviewed from across disciplines such as nursing, medicine, engineering, statistics, population science, computer science and mathematics where hospital nurse staffing was the subject of the study.

### Results

A number of themes emerged. The first iteration showed the predominance of unit base approaches (e.g. nurse numbers, ratios, activity and workload) the second was the development of methodologies. Subsequent iterations examined issues such as demand, safety, nurse education, turnover, patient outcomes, patient or staff satisfaction, workload and activity. The majority of studies examined (n=767) demonstrated some association between staffing (units or type/skill) and various factors such as staff or patient satisfaction, working conditions, safety parameters, outcomes complexity of work achieved, work left undone or other factors. Many potential areas such as operational safety research were not utilised.

### Conclusion

Although the relationship between staffing in acute care and factors such as units, safety or workload is complex, the evidence suggests an interdependent relationship which should only be dismissed with caution. The nature of these relationships should be further examined in order to determine nurse staffing. The body of knowledge appears substantial and complex yet appears to have little impact on policy.

### Strengths and limitations of this study

This is a review of the existing literature across many fields and focuses on cross disciplinary approaches.

By encompassing many fields breadth rather than depth limits the analysis.

1  
2  
3 This study suggests looking at the issue of safe staffing from a wider operational  
4 safety perspective could uncover additional insight and solutions.  
5  
6  
7

## 8 9 **Funding Statement**

10 This research received no specific grant from any funding agency in the public,  
11 commercial or not-for-profit sectors.  
12  
13

## 14 **Competing interests**

15 There are no competing interests.  
16  
17

## 18 **Data sharing agreement**

19 All of the papers reviewed are in the public domain.  
20  
21  
22

## 23 **Introduction**

24  
25 The question of registered nurses staffing hospitals to a level that is safe, high  
26 quality and cost effective has become a key issue worldwide. In terms of research it  
27 has also become something of a Gordian knot-one that attracts many attempts to  
28 solve but few solutions. Extending this question to community nursing and areas  
29 such as mental health or learning disability nursing demonstrate the complexity of  
30 the problem. Fundamental questions such as “How many nurses are needed?”  
31 “What kind of skill mix?” “Are staffing ratios the solution?” remain largely  
32 unanswered.  
33  
34  
35

36 These issues present interesting theoretical problems but they have a very real world  
37 application as they underpin the safety of patients both in hospital and community. It  
38 could be argued that nursing is only visible by its absence such as those reported by  
39 Francis in the enquiry into the deaths at Mid Staffordshire NHS Foundation trust<sup>1</sup>.  
40 Nursing is the largest part of the healthcare workforce<sup>2</sup> and attempts to curtail costs  
41 have seen radical workforce changes including reducing the number of registered  
42 nurses or replacing them with assistive personnel (Needleman 2016). It is of interest  
43 that there have been a number of coroners commenting on staffing levels under  
44 section 28 of the Coroners & Justice Act 2009<sup>3</sup>. This allows a Coroner in England to  
45 report circumstances where it may prevent further deaths. There are several  
46 examples of this for both the acute and care home sectors in recent years<sup>4</sup>.  
47  
48  
49  
50

51 Issues of staffing are further complicated by a lack of consensus within the  
52 profession around the levels of care that should be provided or calculated. Is there a  
53 difference between safe care and good care? Should all care be given by a  
54 registered nurse (RN)? Certainly, policy decisions in England are promoting the  
55 transfer of care to assistive personnel such as Nursing Associates<sup>5</sup> for a variety of  
56 reasons such as shortage of RNs and increasing costs. Financial burden is a primary  
57 driver of workforce determinants. Investing in one aspect of staffing often means  
58  
59  
60

1  
2  
3 scaling back elsewhere, resulting in “trade-offs” for example using less educated  
4 staff or changing nurse patient ratios<sup>6</sup>.  
5

6 Different countries within the UK are taking different policy positions on staffing  
7 which varies from guidance in England to legislation in Scotland and Wales<sup>7</sup>.  
8  
9

10 In order to make sense of the variation in published work a hermeneutic approach is  
11 taken. Such an approach is to question and to remain open to what might be  
12 revealed<sup>8</sup>. Different researchers have used different approaches to understand  
13 various aspects of this problem and the aim of this work to reveal a deeper  
14 understanding and understand more about the interrelational nature of the problem.  
15 This paper reviews the approaches that have been used to investigate the idea of  
16 safe staffing, the knowledge elicited and explores direction this area of research  
17 might take in the future.  
18  
19  
20  
21  
22

## 23 **Method**

24  
25 Hermeneutic reviews<sup>9</sup> utilise a process of searching and interpretation as  
26 interrelational activity (Figure 1). This is because the focus is on the understanding  
27 and interpretation of the materials. In a subject with a high volume of literature, this  
28 approach allows the integration of interpretation and analysis of the literature and the  
29 development of searching as part of the review. A hermeneutic framework describes  
30 the literature review process as fundamentally a process of developing  
31 understanding that is iterative in nature<sup>9</sup>. This has allowed a much wider perspective  
32 incorporating a wider search and analysis than for example a systematic review  
33 utilising methods such as PRISMA<sup>10</sup>. This body of evidence uses an extremely  
34 diverse set of methodologies ranging from inductive studies reliant on qualitative  
35 data to areas of computational mathematics. This would make approaches such as  
36 meta-analysis almost impossible.  
37  
38  
39  
40  
41

42 Initial reading indicated that the work on this topic was not limited to the nursing  
43 literature and so the first iteration was to expand the search to areas such as  
44 computer science, maths and engineering. A search of the common databases was  
45 undertaken including those in informatics and computational mathematics (PubMed,  
46 CINAHL, arXiv, CiteSeerX, IEEEXplore) using search terms “nursing” (for computer  
47 science, maths and engineering only as this is a minority term) “nurse staffing”  
48 “nurse workload” “hospital staffing” “nursing ratios” “safe staffing” “staffing” AND  
49 “patient safety” in the past 15 years (2003-2018). All terms were in English. A  
50 successive fractions approach was used to refine this search<sup>9</sup>. Systematic reviews  
51 were included where primary research is available. Initial reading also revealed a  
52 paucity of work in area such as mental health, community care and learning disability  
53 and so the focus remained on acute hospital staffing.  
54  
55  
56  
57  
58  
59  
60

1  
2  
3 This generated 7323 items. A significant proportion of work in the area of nurse  
4 staffing has taken the form of editorials and various types of commentary or opinion  
5 pieces rather than empirical studies. After elimination of opinion pieces and  
6 professional non peer reviewed literature there remained in excess of 700 papers  
7 (n=769) across the different disciplines. These were reviewed and have broadly  
8 been themed to gain insight into the different approaches and relational research  
9 used to examine the issue of staffing within a wider context of safety. A  
10 supplementary file contains more detail on how these studies were selected.  
11  
12  
13

### 14 **Patient and public involvement**

15  
16 This is a review of the existing literature and so there was no patient involvement at  
17 this stage. Subsequent iterations would have patients/public co-researchers to co-  
18 create questions and design subsequent studies.  
19  
20

### 21 **Results**

22  
23 In terms of analysis specific themes started to emerge which were anchored around  
24 methodology and the different lenses through which the issue of nurse staffing is  
25 seen. Approaches to the question framed as “how many do we need?” are  
26 commonly approached as units, for example, numbers of workforce, ratios (nurse to  
27 patient or nurse to furniture) unit/ward levels of activity, job (different types of nursing  
28 such as paediatric, theatres or intensive care) or contextually/situationally. It is  
29 interesting to note that some situational perspectives originated from systems  
30 engineering approaches such as Caryaon & Gurses<sup>11</sup> systems engineering approach  
31 in intensive care units.  
32  
33  
34  
35

36 After examining the literature iteratively, a number of themes emerge. Any of these  
37 themes would merit study in their own right, but a broad overview of the different  
38 approaches and their application is given here. What is striking is the range of  
39 approaches used. These range from descriptive studies to the development of  
40 operational mathematical models.  
41  
42  
43

### 44 **Nursing as units, workload or activity.**

45  
46 The literature on the development of a ratio or the effect of nurse to patient ratios is a  
47 common theme in the nursing literature. A meta-analysis by Driscoll<sup>12</sup> draws on 35  
48 studies which show an association between nurse staffing ratios and patient  
49 outcomes. These studies use large administrative data sets and found that higher  
50 staffing levels were associated with reduced mortality, reduced medication errors,  
51 reduction in incidence of pressure ulcers, reduced use of restraint, reduction in  
52 infections, such as hospital acquired pneumonia, higher aspirin use and a greater  
53 number of patients receiving treatment. It is interesting to note that all of these  
54 studies are either cross sectional or point prevalence studies. When examining this  
55 section of the literature, cross sectional studies dominate.  
56  
57  
58  
59  
60

1  
2  
3 Shindul-Rothschild et al<sup>13</sup> notes how workload impacts on efficiency in emergency  
4 departments. Using regression in trauma centres, the time to a diagnostic evaluation  
5 significantly increased when nurses cared for a higher number of patients. Aikens  
6 work on RN 4Cast<sup>14</sup> shows that an increase in a nurses' workload by one patient  
7 increased the likelihood of an inpatient dying within 30 days of admission by 7%.  
8 They also found that every 10% increase in bachelor's degree nurses was  
9 associated with a decrease in this likelihood by 7%. These associations imply that  
10 patients in hospitals in which 60% of nurses had bachelor's degrees and nurses  
11 cared for an average of six patients would have almost 30% lower mortality than  
12 patients in hospitals in which only 30% of nurses had bachelor's degrees and nurses  
13 cared for an average of eight patients. Skillmix is also a feature of this body of work.  
14 Graduate RNs are associated with better outcomes while higher registered nurse to  
15 patient ratios or support worker to registered nurse ratios are associated with poorer  
16 outcomes<sup>15</sup>. Diane Boyle's study<sup>16</sup> found that higher Registered Nurse Hours Per  
17 Patient Day (RNHPPD) was associated with improvements in total fall rates over  
18 time. This finding was not unique with various studies exposing the same association  
19 for example Staggs and Dunton<sup>17</sup> found that skillmix of a higher rate of assistive  
20 personnel was associated with an increase in falls but there was variation. On acute  
21 medical units there was a weak association between decrease in falls and increase  
22 in RN staffing, but in step down and medical units the authors concluded that  
23 increasing non RN staffing was ineffective for decreasing falls. Increasing RN  
24 staffing did have a positive impact but this varied by unit type. White et al<sup>18</sup> in  
25 another cross-sectional study (N=353,333) examined a historical dataset using  
26 thirty-day mortality and failure to rescue as endpoints and found that each 10%  
27 increase in the proportion of graduate nurses was associated with 4% lower odds of  
28 death in the older population 10% lower odds of death for those with dementia. This  
29 was associated with better odds of rescue where graduate nurses are deployed.

30 Relationships between staffing factors and outcomes are complex<sup>19,20,21</sup> and the  
31 causal relationship is not fully understood. However we know from other studies that  
32 there is a deficit in care if staffing is not adequate. For example, in a study by Ball et  
33 al<sup>22</sup> nurses (86%) reported that one or more care activity had been left undone due  
34 to lack of time on their last shift. Most care frequently left undone were: comforting or  
35 talking with patients (66%), educating patients (52%) and developing/updating  
36 nursing care plans (47%). The odds of care being left undone halved when nurses  
37 had six or less patients to care for. The work left undone has become a more specific  
38 area of enquiry with more authors coming to essentially the same conclusions<sup>23</sup>.  
39 Missed care appears to be common and perhaps even predictable. The work of  
40 Bragadottir et al<sup>24</sup> examined the correlates and predictors of missed nursing care in  
41 hospitals using regression. Such approaches may contribute to future demand based  
42 models.

43 A substantial body of evidence has been built which uses the approach of nurses,  
44 nursing care or patients as units of work activity.  
45  
46  
47  
48  
49  
50  
51  
52  
53  
54  
55  
56  
57  
58  
59  
60

1  
2  
3 Many factors contribute to workload and the relationship with safety is frequently  
4 investigated. Adequate staffing and resources, administrative support, and  
5 collaborative workplace relationships have been shown to improve patient safety,  
6 and factors such as low job satisfaction, staff turnover, and high workload increase  
7 risk to patient safety<sup>25,26</sup>.  
8  
9

10 Nursing workload is subjected to “measurement” using a plethora of measurement  
11 tools which numerate tasks. Most of these tools tend to view nursing workload as  
12 countable tasks, which is likely to be an oversimplification of complex work. Such  
13 tools do not recognise the ‘other’ work which nurses do related to workplace culture  
14 and climate<sup>27</sup>. Fasoli & Haddock<sup>28</sup> after an extensive review of nurse workload  
15 classification systems, reported there was no gold standard system for doing this  
16 and current measures were not sensitive enough. This is reflected in findings that the  
17 data collected routinely by nurses is not of sufficient quality to perform such complex  
18 modelling<sup>17,29,30</sup>.  
19  
20  
21  
22

23 There has been a preoccupation with “time and motion” studies but these are of  
24 limited use in complex work<sup>31,32</sup> as a result this method cannot handle relational  
25 work<sup>33</sup> and is therefore likely to underestimate nursing workload.  
26  
27

28 There are measures which consider the complexity of the work<sup>34</sup> and workload  
29 emerged as a theme including systematic reviews of the effect of workload on  
30 patient safety<sup>35,11</sup>. Several inductive subgroups emerged including the role of  
31 workload and subsequent delegation of tasks which leads to delegation of safety  
32 critical activity such as vital signs monitoring for example how local modifications to  
33 track and trigger systems can reduce accuracy the of predictive algorithms<sup>36</sup> or the  
34 workplace environment as a factor of workload<sup>37</sup>.  
35  
36  
37

38 There has been some examination of redistribution of workload<sup>38</sup> in which there has  
39 been some measurable increase in clinical time by workload redistribution. Although  
40 this review does not consider the costs of staffing there are some interesting papers  
41 on this. Perhaps one of the most interesting is Newbold’s 2008 model<sup>39</sup> which used  
42 Aiken’s 2003<sup>40</sup> study, looked at nurse levels of education and patient mortality in  
43 terms of a trade-off: what would a cost/mortality look like. Other researchers have  
44 also utilised the cross sectional work to iterate mathematical models with some  
45 success.  
46  
47  
48  
49  
50

## 51 **Workforce**

52 Levels of workforce skill and education also feature in the literature. Much of the  
53 work linking staffing (units or education) to outcomes looks at specific aspects of  
54 care or harm. Boyle et al<sup>16</sup> found an association between speciality nursing  
55 education (post registration certification) and improvement in the rates of falls using  
56 a longitudinal model (903 hospitals over 6 years) which echoed the findings of  
57  
58  
59  
60

1  
2  
3 Kendall-Gallagher & Blegen<sup>41</sup>, Lange et al<sup>42</sup> and Boltz et al<sup>43</sup>. For example, the Lang  
4 paper found that units staffed with two or more geriatric-certified nurses had  
5 significantly lower fall rates than units with one or no geriatric-certified nurses<sup>42</sup>.  
6 There appears to be a body of evidence supporting a higher skilled educated  
7 workforce as associated with less harm although it is interesting to note that Magnet  
8 hospitals were associated with higher rates of falls<sup>44</sup>. There are numerous papers  
9 linking RN staffing with patient outcomes/harm but fewer on education. One  
10 interesting single centre study looked at the consequences of outlying patients to  
11 non-specialist wards which was associated with an increase in mortality<sup>45</sup>.  
12  
13  
14  
15

16 In a recent systematic review<sup>46</sup> eighteen studies were examined which gave  
17 subjective reports of missed care. 75% or more nurses reported omitting some care.  
18 Fourteen of these studies found low nurse staffing levels were significantly  
19 associated with higher reports of missed care. There was little evidence that adding  
20 support workers to the team reduced this. The authors noted that the extent to which  
21 the relationships observed link to outcomes has yet to be investigated.  
22  
23  
24

25 Other work suggests that adding assistive nursing personnel without professional  
26 nurse qualifications may contribute to preventable deaths, erode quality and safety of  
27 hospital care<sup>14</sup>. Where studies have explored the impact of second level nurses,  
28 similar to enrolled nurse qualification, the evidence is not supportive of the role<sup>47</sup>.  
29  
30

31 Satisfaction with work and other factors such as environmental, workload, working  
32 hours and effect of skill mix. In some cases there is evidence of an association  
33 between shift length, staff satisfaction and patient outcomes<sup>48</sup> which associated  
34 longer shifts with more care left undone. These studies usually take the form of cross  
35 sectional surveys as there appears to be no routine data collection of these data.  
36 Unlike the concepts of staffing, there is much more consistency in the reporting of  
37 issues related to workload such as moral distress, burn out and compromise of both  
38 personal and professional values including the erosion of identity<sup>49</sup>. The corollary of  
39 this also occurs in that papers describing moral distress also cite inadequate staffing  
40 as a causative attribute<sup>50</sup>.  
41  
42  
43  
44

45 Staffing and turnover is also occasionally reported in terms of outcomes for example  
46 turnover and patient outcomes. In 2014 Park et al<sup>51</sup> examined episodic unit-level  
47 data from 2008 to 2010. This study examined 10,935 unit-quarter observations  
48 (2,294 units, 465 hospitals) using multilevel regression. They found that the effect of  
49 RN turnover on unit-acquired pressure ulcers was significant and “lagged” in terms of  
50 time. For every 10 percentage-point increase in RN turnover in a quarter, the odds of  
51 a patient having a pressure ulcer increased by 4 percent in the next quarter. Higher  
52 RN turnover in a quarter was associated with lower RN staffing in the current and  
53 subsequent quarters. Higher RN staffing was associated with lower pressure ulcer  
54 rates, but it did not mediate the relationship between turnover and pressure ulcers.  
55  
56  
57  
58  
59  
60



1  
2  
3 There appears to be a growing body of literature which examines resilience. The  
4 emotional labour of nursing involves managing the emotional demands of nursing  
5 work. An integrative review by Delgado et al<sup>26</sup> identified the difficult nature of not only  
6 the work but the opportunities, or lack of, to build personal resilience.  
7  
8

9  
10 Alves et al<sup>52</sup> found that RNs nurses with greater autonomy, good working  
11 relationships and control over their work environment had lower levels of emotional  
12 exhaustion, higher job satisfaction, less intention of leaving. Although they did not  
13 associate findings with patient outcomes these and other authors have found  
14 positive associations with autonomy and rescue rates and mortality-and they are  
15 more likely to experience this in small and non-teaching hospitals<sup>53</sup>. This a consistent  
16 theme in the literature reflected in a scoping review of twelve studies<sup>54</sup> which  
17 concludes that structural empowerment effects the quality of care and patient safety  
18 in hospital. This is also reflected in perceptions of safety culture and outcomes.  
19 When adequate resource is allocated in terms of staffing the perception of safety and  
20 patient satisfaction improves<sup>55</sup>.  
21  
22  
23  
24  
25  
26

### 27 **Understanding the complex relationship**

28  
29 There were a number of studies that used various aspects of data science. These  
30 ranged from Baysian approaches<sup>56</sup>, to systems thinking, modelling, computational  
31 mathematics and approaches such as machine learning. Many of these papers  
32 appeared outside of the nursing literature and were located via databases that serve  
33 the physical sciences, engineering and mathematics.  
34  
35

36  
37 This includes work such as Aickelin et al<sup>57</sup>, who developed a memetic evolutionary  
38 algorithm to achieve explicit learning in rule-based nurse rostering, which involves  
39 applying a set of heuristic rules for each nurse's assignment. This uses a set of  
40 building blocks in terms of data and rules to build an Estimation of Distribution  
41 Algorithm (EDA). As the authors point out, although this performs well in some "real  
42 world" situations it is limited by its ability to learn-one of the solutions is to add more  
43 nurses to the model without understanding that this might be a constraint.  
44  
45

46  
47 Pitkaaho et al<sup>58</sup> used Finnish data from over 35,000 episodes of care to determine  
48 relationships between nurse staffing and patients' length of stay in acute care units  
49 and to determine whether non-linear relationships exist between variables using a  
50 Bayesian approach. They found that acuity was the overriding factor that connected  
51 all eleven variables in the dependency network of nurse staffing and short length of  
52 stay. Non-linear associations were found between short length of stay and the  
53 proportion of RNs. Skill mix consisting of an average proportion of Registered  
54 Nurses (65–80%) was conducive to a short length of stay and predicted a 66%  
55 likelihood of short length of stay. Lower percentages of RN predicted lower likelihood  
56 of short length of stay.  
57  
58  
59  
60

1  
2  
3 An overriding theme in these approaches are challenges in the real world. Well-  
4 constructed approaches to calculating staffing needing more work than authors  
5 anticipated when tested in reality. This is not unusual-these approaches tend to be  
6 iterative, however it is interesting to note that a number of these approaches  
7 concluded that previous staffing models had underestimated ratios and staffing  
8 requirements in areas examined such as recovery<sup>59</sup>.  
9

10  
11  
12 Other authors such as Park<sup>60</sup> are now building more optimized models based on  
13 operational mathematical approaches and are likely to yield a more comprehensive  
14 approach to the problem of computing staffing and outcomes as they accommodate  
15 complexity.  
16

17  
18 Data science approaches were the only ones to consider knowledge stock or  
19 knowledge flow in the early part of the 21<sup>st</sup> century but little consideration was given  
20 to this after this time<sup>61</sup>.  
21

22  
23 The advent of data science offers many opportunities however nursing may not be  
24 placed to capitalise on them<sup>62</sup>. Lack of high quality data is a recurring issue in terms  
25 of both unit based approaches and approaches using data science to examine  
26 complexity. Nursing data is generally episodic and lacks sensitivity to the activity that  
27 nurses perform. In the studies, most informatics systems use taxonomies or lists of  
28 tasks which are limited and show no apparent relationship with time taken. Another  
29 issue is the dominance of supply side (nurse units of time for example) and not the  
30 demand from patients which is rarely looked at.  
31  
32

### 33 34 **Refining and leaving the hermeneutic circle**

35  
36 A key facet of Gadamer's<sup>8</sup> approach is not to leave the hermeneutic circle due to its  
37 inescapability and as such the review has focussed on the search. However the  
38 author is from a positivist paradigm and so has broken the circle at this juncture. This  
39 method is an inductive one and as such recognises that the iterations of searching  
40 and analysis could be infinite. The themes that emerge here across the literature are  
41 not exhaustive but provide a break in the cycle of searching and analysis. The  
42 exploration of these themes can be further built up. The papers reviewed offered  
43 many directions in which to expand this area of enquiry and these are shown in  
44 Figure 2.  
45  
46  
47  
48

### 49 **Discussion**

50  
51 Although the evidence in the nursing literature appears to offer no firm guidance on  
52 staffing models or absolute solutions, this could be seen as reassurance because it  
53 also demonstrates the complexity of the problem. The literature describes different  
54 associations between various factors such as outcomes and staffing numbers/skill  
55 mix. Each piece of work gives a slightly different perspective but an overarching  
56 emerging theme is that a relationship does exist between different factors even if  
57 these relationships are not fully understood, there is an apparent effect.  
58  
59  
60

1  
2  
3 The conceptual difficulty safety presented in the context of staffing was an emerging  
4 theme. How is safe differentiated from unsafe, what is optimal staffing and where  
5 should trade off occur. These studies help with clarification of the problem but there  
6 is little consistency in this body of work in terms of a solution.  
7  
8  
9

10  
11 One of the themes herein was the repeated association with not only numbers of  
12 RNs but the educational level in the workplace. This appeared to show an overall  
13 benefit in employing RNs and also RNs with a degree level qualification. Some  
14 authors note this in the employment marketplace-that employers are acting on these  
15 findings and recording a downward trend in using assistive roles in the USA<sup>63</sup>.  
16  
17

18  
19 It is interesting that only one paper mentioned knowledge stock and knowledge flow.  
20 None of the papers reviewed examined nurse staffing in terms of being a knowledge  
21 intense occupation which is a factor in modelling workforces in other safety critical  
22 industries or in other fields where operations are highly reliant on professional  
23 knowledge such information technology<sup>64</sup>. This might be because the approach to  
24 workforce modelling in nursing is focussed on linear, deterministic approaches such  
25 as time and motion or time filled with tasks. This is more akin to workforce modelling  
26 in the service industries<sup>65</sup>.  
27  
28  
29

30  
31 There is narrative which focusses on a fixed ratio as staffing model in nursing. Ratios  
32 are common in other safety critical industries or area such as mass gatherings  
33 however it is often used as a failsafe rather than a staffing model<sup>66</sup> which might be a  
34 more practical option for nursing.  
35

36  
37 The literature is supportive of a relationship between staffing, skillmix and education  
38 and this has been reviewed before<sup>67</sup> however circling out beyond the nursing  
39 literature affirms this. Many reviews or policy documents appear to be confined to the  
40 nursing or medical literature and yet a rich seam of enquiry appears outside of these  
41 fields. What is striking is that there was very little overlap in areas of enquiry such as  
42 safety critical operations research, demand modelling or knowledge based workforce  
43 research and acute nurse staffing (Figure 2). Researchers should widen their  
44 perspectives on methodologies and approaches to include other disciplines  
45 particularly the approaches of safety critical industries. By doing so it is possible to  
46 iterate an initial understanding of demand which can begin to integrate areas such as  
47 workforce and safety-an interpretation is given in Figure 3.  
48  
49  
50

### 51 **Strengths and limitations of this study**

52  
53 This is a review of the existing literature across many fields and focuses on cross  
54 disciplinary approaches. By encompassing many fields, breadth rather than depth  
55 limits the analysis but does take the literature in context to form an overall view.  
56 There is a risk of over simplifying the literature and the knowledge at this scale.  
57  
58  
59  
60

## Conclusion

There is a wide variety of literature from different paradigms that support a complex interrelationship between different factors in acute nurse staffing. Despite a growing body of knowledge, there appears to be little reference to nursing as safety critical nor is the problem viewed through this lens. It is suggested that looking outside the discipline of nursing might add valuable insight to this problem.

The issue of nurse staffing is a complex one and the relationships between factors such as nursing and patient outcomes is also complex. Despite this no papers examined nursing as a knowledge intensive operation or as a safety critical workforce. There is an increasing body of knowledge outside of nursing which has focussed on this topic but is rarely utilised.

Although this is an emerging area, evidence repeatedly suggested a complex interdependent relationship between nurse staffing and various factors such as patient safety. Hermeneutic approaches can offer new insight by focussing in interpretation and has been used to generate knowledge<sup>68</sup>.

Given the asserted complexity of work, time and motion or other simplistic activity analysis (measuring nursing in a linear or deterministic way) should be avoided. The importance of this emerging relationship should be considered when examining staffing. This study suggests looking at the issue of safe staffing from a wider operational safety perspective could uncover additional insight and solutions.

## Ethical Permissions

This is a review of the literature. Ethical permission was not sought.

## Author's contribution

AL design, analysis, writing, GP analysis and writing.

## Acknowledgements

The authors would like to acknowledge Dr M Alexander for help in identifying cases from the coroner. Dr Elaine Maxwell for help in formulating the area of enquiry.

## Figure Legends

Figure 1 The hermeneutic circle as a framework for literature reviews

Figure 2 The areas of enquiry and potential overlap with other interdisciplinary areas- the bordered area contains the literature reviewed

Figure 3 Contextualising the findings in terms of demand

## References

1. Francis R (2013) The Mid Staffordshire NHS Foundation Trust Public Inquiry. Report of the Mid Staffordshire NHS Foundation Trust Public Inquiry: Executive Summary. London: Stationery Office.
2. NHS Digital (2017) Nurse & health visitor-numbers September 2012 to 2017 <https://digital.nhs.uk/article/8471/Nurse-health-visitor-numbers-September-2012-to-2017> Accessed February 2018
3. Ministry of Justice (2013) *Coroners & Justice Act 2009; Coroners (Investigation) Regulations 2013 Regulation 28: report to prevent future deaths* HM Government
4. Office of the Coroner, District of Hertfordshire (2013). *Section 28 and Letter in the case of John Gwynfryn MORRIS, deceased* <https://www.judiciary.gov.uk/wp-content/uploads/JCO/Documents/coroners/pfds/care-home/Morris+2013-0295.pdf> Accessed March 2018
5. Health Education England (2015) Raising the Bar Shape of Caring: A Review of the Future Education and Training of Registered Nurses and Care Assistants <https://www.hee.nhs.uk/sites/default/files/documents/2348-Shape-of-caring-review-FINAL.pdf> Accessed March 2018
6. Berkow, S; Vonderhaar K, Stewart J, Virkstis K Terry A (2014) Analyzing Staffing Trade-Offs on Acute Care Hospital Units *Journal of Nursing Administration: October 2014 - Volume 44 - Issue 10 - p 507–516*
7. Welsh Government (2015). Nurse Staffing Levels Act 2016. Cardiff: HM Welsh Government
8. Gadamer, H.G., (1975) *Truth and method*. Seabury, New York
9. Boell SK, Cecez-Kecmanovic D (2014) A hermeneutic approach for conducting literature reviews and literature searches. *CAIS*, Volume 34, Article 12, pp. 257-286, January 2014.
10. Moher D, Liberati A, Tetzlaff J, Altman DG, The PRISMA Group (2009). Preferred Reporting Items for Systematic Reviews and Meta-Analyses: The PRISMA Statement. *PLoS Med* 6(7): e1000097. doi:10.1371/journal.pmed1000097
11. Carayon P, Gurses A (2005) Nursing workload and patient safety in intensive care units: a human factors engineering evaluation of the literature. *Intensive Crit Care Nurs.* 2005;21:284–301.
12. Driscoll, A Grant, M, Carroll, D, Dalton, S, Deaton, C, Jones, I, Lehwaldt, D, McKee, G Munyombwe, T, Astin, F (2017) The effect of nurse-to-patient ratios on nurse-sensitive patient outcomes in acute specialist units: a systematic review and meta-analysis *European Journal of Cardiovascular Nursing* Volume: 17 issue: 1, page(s): 6-22
13. Shindul-Rothschild J Read CY Stamp KD Flanagan J (2016) Nurse Staffing and Hospital Characteristics Predictive of Time to Diagnostic Evaluation for

- 1  
2  
3 Patients in the Emergency Department *Journal of Emergency Nursing* Volume  
4 43, Issue 2, Pages 138–144  
5  
6 14. Aiken LH, Sloane D, Griffiths P, et al (2016) Nursing skill mix in European  
7 hospitals: cross-sectional study of the association with mortality, patient  
8 ratings, and quality of care *BMJ Qual Safety* Published Online First: 15  
9 November 2016. doi: 10.1136/bmjqs-2016-005567  
10  
11 15. Griffiths P, Ball J, Murrells T, et al (2016) Registered nurse, healthcare  
12 support worker, medical staffing levels and mortality in English hospital trusts:  
13 a cross-sectional study *BMJ Open* 2016;6:e008751. doi: 10.1136/bmjopen-  
14 2015-008751  
15  
16 16. Boyle DK, Cramer E, Potter C et al (2015). Longitudinal association of  
17 registered nurse national nursing specialty certification and patient falls in  
18 acute care hospitals. *Nurs Res* 2015;64:291–9.  
19  
20 17. Staggs VS E Dunton N (2013) Associations between rates of unassisted  
21 inpatient falls and levels of registered and non-registered nurse staffing  
22 *International Journal for Quality in Health Care*, Volume 26, Issue 1, 1  
23 February 2014, Pages 87–92  
24  
25 18. White, E. M., Smith, J. G., Trotta, R. L. and McHugh, M. D. (2018), Lower  
26 Postsurgical Mortality for Individuals with Dementia with Better-Educated  
27 Hospital Workforce. *J Am Geriatr Soc*. doi:10.1111/jgs.15355  
28  
29 19. Ebright P Patterson ES, Chalko BA, Render ML (2003) Understanding the  
30 complexity of registered nurse work in acute care settings. *Journal of Nursing*  
31 *Administration* 2003 Dec;33(12):630-8  
32  
33 20. Leary A, Cook R, Jones S, Smith J, Gough M, Maxwell E, Punshon G,  
34 Radford M (2016) Mining routinely collected acute data to reveal non-linear  
35 relationships between nurse staffing levels and outcomes. *BMJ Open*  
36 6(12),e011177  
37  
38 21. Huber E., Kleinknecht-Dolf M., Müller M., Kugler C. & Spirig R. (2017)  
39 Mixed-method research protocol: defining and operationalizing patient-related  
40 complexity of nursing care in acute care hospitals. *Journal of Advanced*  
41 *Nursing* 73(6), 1491–1501. doi: 10.1111/jan.13218  
42  
43 22. Ball J, Murrells T, Rafferty AM, Morrow E, Griffiths P (2014) Care left undone'  
44 during nursing shifts: associations with workload and perceived quality of care  
45 *BMJ Qual Safety* 2014 Feb;23(2):116-25  
46  
47 23. Recio-Saucedo A, Dall'Ora C, Maruotti A, et al. What impact does nursing  
48 care left undone have on patient outcomes? Review of the literature. *J Clin*  
49 *Nurs*. 2017 Aug 31; [Epub ahead of print]  
50  
51 24. Bragadóttir, H., Kalisch, B. J. and Tryggvadóttir, G. B. (2017), Correlates and  
52 predictors of missed nursing care in hospitals. *J Clin Nurs*, 26: 1524-1534.  
53 doi:10.1111/jocn.13449  
54  
55 25. Hui-Ying Chiang, H., Hsiao, Y., and Lee, H (2017) Predictors of hospital  
56 nurses' safety practices, work environment, workload, job satisfaction, and  
57 error reporting. *Journal of Nursing Care Quality*. 2017; 32: 359–368  
58  
59  
60

- 1  
2  
3 26. Delgado, C., Upton, D., Ranse, K., Furness, T., and Foster, K. (2017) Nurses'  
4 resilience and the emotional labour of nursing work: an integrative review of  
5 empirical literature. *International Journal of Nursing Studies*. 2017; 70: 71–88  
6  
7 27. Ross, C Rogers C (2017) RN? Registered or rubber nurse? *Collegian*,  
8 Volume 24, Issue 6, 551 - 555  
9  
10 28. Fasoli, D.R., Fincke, B., & Haddock, K.S. (2011). Going beyond patient  
11 classification systems to create an evidence based staffing methodology.  
12 *Journal of Nursing Administration*, 41(10), 434-439  
13  
14 29. Leary A, Tomai B, Swift A, Woodward A, Hurst K (2017) Nurse staffing levels  
15 and outcomes - mining the UK national data sets for insight. *Int J Health Care*  
16 *Qual Assur*. 2017 Apr 18;30(3):235-247. doi: 10.1108/IJHCQA-08-2016-0118.  
17  
18 30. Keenan GM, Lopez KD, Sousa VEC, Stifter J, Macieira TGR, Boyd AD, Yao  
19 Y, Herdman TH, Moorhead S, McDaniel A, Wilkie DJ (2018) A Shovel-Ready  
20 Solution to Fill the Nursing Data Gap in the Interdisciplinary Clinical Picture *Int*  
21 *J Nurs Knowl*. 2018 Jan;29(1):49-58. doi: 10.1111/2047-3095.12168. Epub  
22 2017 Jan 16. PMID: 28093877  
23  
24 31. De Leon E. Industrial psychology. London: Rex Publishing, 1993  
25  
26 32. Raiborn CA (2004). Managerial accounting. Melbourne, Australia: Nelson  
27 Thomson Learning, 2004  
28  
29 33. Malloch K (2015) Measurement of Nursing's Complex Health Care Work:  
30 Evolution of the Science For Determining the Required Staffing For Safe and  
31 Effective Patient Care July 2015 *Nursing economics* 33(1):20-25  
32  
33 34. Junttila, J.K., Koivu, A., Fagerström, L., Haatainen, K., and Nykänen, P.  
34 Hospital mortality and optimality of nursing workload: a study on the predictive  
35 validity of the RAFAELA nursing intensity and staffing system. *International*  
36 *Journal of Nursing Studies*. 2016; 60: 46–53  
37  
38 35. Lang TA, Hodge M, Olson V, et al. Nurse-patient ratios: a systematic review  
39 on the effects of nurse staffing on patient, nurse employee, and hospital  
40 outcomes. *J Nurs Adm*. 2004;34(7–8):326–37.  
41  
42 36. McGaughey J, O'Halloran P, Porter S, Trinder J, Blackwood B (2017). Early  
43 warning systems and rapid response to the deteriorating patient in hospital: A  
44 realist evaluation. *J Adv Nurs*. 2017;73:3119–3132.  
45  
46 37. Simon M, Maben J, Murrells T, Griffiths P. (2016) 'Is single room hospital  
47 accommodation associated with differences in healthcare-associated  
48 infection, falls, pressure ulcers or medication errors? A natural experiment  
49 with non-equivalent controls'. *SAGE Journal of Health Services Research and*  
50 *Policy*, 21 (3), pp. 147-155.  
51  
52 38. Hamilton J, Verrall T, Maben J, Griffiths P, Avis K, Baker G, Teare G. (2014)  
53 'One size does not fit all: a qualitative content analysis of the importance of  
54 existing quality improvement capacity in the implementation of Releasing  
55 Time to Care: the Productive Ward™ in Saskatchewan, Canada'. *BMC BMC*  
56 *Health Services Research*, 14  
57  
58 39. Newbold D. (2008) The production economics of nursing: a discussion paper.  
59 *International Journal of Nursing Studies* 45(1), 120–128.  
60

- 1  
2  
3  
4  
5  
6  
7  
8  
9  
10  
11  
12  
13  
14  
15  
16  
17  
18  
19  
20  
21  
22  
23  
24  
25  
26  
27  
28  
29  
30  
31  
32  
33  
34  
35  
36  
37  
38  
39  
40  
41  
42  
43  
44  
45  
46  
47  
48  
49  
50  
51  
52  
53  
54  
55  
56  
57  
58  
59  
60
40. Aiken, L.H. Clarke, SP Cheung, RB Sloane, DM Silber JH (2003) Education levels of hospital nurses and patient mortality *Journal of the American Medical Association*, 290 (2003), pp. 1617-1623
  41. Kendall-Gallagher D., Blegen M. A. (2009). Competence and certification of registered nurses and safety of patients in intensive care units. *American Journal of Critical Care*, 18, 106– 113. doi:10.4037/ajcc2009487
  42. Lange J., Wallace M., Gerard S., Lovanio K., Fausty N., Rychlewicz S. (2009). Effect of an acute care geriatric educational program on fall rates and nurse work satisfaction. *Journal of Continuing Education in Nursing*, 40, 371– 379.
  43. Boltz M., Capezuti E., Wagner L., Rosenberg M. C., Secic M. (2013). Patient safety in medical-surgical units: Can nurse certification make a difference? *Medsurg Nursing*, 22, 26– 32, 37
  44. Boyle D. K., Gajewski B. J., Miller P. A. (2012). A longitudinal analysis of nursing specialty certification by Magnet® status and patient unit type. *The Journal of Nursing Administration*, 42, 567– 573.
  45. Bai AD, Srivastava S, Tomlinson GA, et al (2018) Mortality of hospitalised internal medicine patients bedspaced to non-internal medicine inpatient units: retrospective cohort study *BMJ Qual Saf* 2018;27:11-20.
  46. Griffiths, P., Recio-Saucedo, A., Dall'Ora, C., Briggs, J., Maruotti, A., Meredith, P., Smith, G. B., Ball, J. and The Missed Care Study Group (2018), The association between nurse staffing and omissions in nursing care: a systematic review. *J Adv Nurs*. Accepted Author Manuscript. doi:10.1111/jan.13564
  47. NNRU (2009) *Policy Plus: Is there a case for the UK nursing workforce to include grades of qualified nurse other than the registered nurse?* National Nursing Research Unit, Kings College London. [http://www.kcl.ac.uk/nursing/research/nnr/policy/Policy-Plus-Issues-by-Theme/Whodeliversnursingcare\(roles\)/PolicyIssue21.pdf](http://www.kcl.ac.uk/nursing/research/nnr/policy/Policy-Plus-Issues-by-Theme/Whodeliversnursingcare(roles)/PolicyIssue21.pdf) accessed March 2018
  48. Ball J, Day T, Murrells T, Dall’Ora C, Rafferty A, Griffiths P, Maben J. (2017) 'Cross-sectional examination of the association between shift length and hospital nurses job satisfaction and nurse reported quality measures'. *BioMed Central BMC Nursing*, 16 (26) doi: 10.1186/s12912-017-0221-7
  49. Maben J, Latter S, Clark JM (2007) The sustainability of ideals, values and the nursing mandate *Nursing Inquiry* 2007 (14) 99-113
  50. Traynor M (2014) Caring after Francis: moral failure in nursing reconsidered *Journal of Research in Nursing* Volume: 19 issue: 7-8, page(s): 546-556
  51. Park, S H, Boyle, D K, Bergquist-Beringer, S, Staggs, V S, Dunton, N E. Concurrent and Lagged Effects of Registered Nurse Turnover and Staffing on Unit-Acquired Pressure Ulcers. *Health Serv Res*. 2014 Aug; 49(4): 1205– 1225.
  52. Alves D.F.D.S., Silva D.D & Guirardello E.D.B. (2017) Nursing practice environment, job outcomes and safety climate: a structural equation modelling analysis *Journal of Nursing Management* 25, 46–55.



- 1  
2  
3 53. van Oostveen C, Vermeulen H (2017) Greater nurse autonomy associated  
4 with lower mortality and failure to rescue rates *Evidence-Based Nursing*  
5 2017;20:56.  
6  
7 54. Goedhart N.S., Van Oostveen C.J., Vermeulen H. (2017) The effect of  
8 structural empowerment of nurses on quality outcomes in hospitals: a scoping  
9 review *Journal of Nursing Management* 25, 194–206  
10  
11 55. Smith, S. A., Yount, N., & Sorra, J. (2017). Exploring relationships between  
12 hospital patient safety culture and Consumer Reports safety scores. *BMC*  
13 *Health Services Research*, 17, 143. <http://doi.org/10.1186/s12913-017-2078-6>  
14  
15 56. Li J and Aickelin U (2006): '*Bayesian Optimisation Algorithm for Nurse*  
16 *Scheduling*', *Scalable Optimization via Probabilistic Modeling: From*  
17 *Algorithms to Applications Studies in Computational Intelligence*, edited by M  
18 Pelikan, K Sastry and E Cantú-Paz, Chapter 17, pp 315-332, Springer  
19  
20 57. Aickelin, U., Burke, E. & Li, J. *J Oper Res Soc* (2007) 58: 1574.  
21 <https://doi.org/10.1057/palgrave.jors.2602308> Accessed September 2017  
22  
23 58. Pitkäaho T., Partanen P., Miettinen M. & Vehviläinen-Julkunen K. (2015)  
24 Non-linear relationships between nurse staffing and patients' length of stay in  
25 acute care units: Bayesian dependence modelling. *Journal of Advanced*  
26 *Nursing* 71(2), 458–473. doi: 10.1111/jan.12550  
27  
28 59. Siddiqui S, Morse E, Levin S (2017) Evaluating nurse staffing levels in  
29 perianesthesia care units using discrete event simulation *Transactions in*  
30 *Healthcare Systems Engineering* 7:4, 215-223  
31  
32 60. Park C.S.-Y. (2017) Optimizing staffing, quality, and cost in home healthcare  
33 nursing: theory synthesis. *Journal of Advanced Nursing* 73(8), 1838–1847  
34  
35 61. Bordoloi SK Matsuo H (2001) Human resource planning in knowledge  
36 intensive operations-a model for learning with stochastic turnover *Eur Jnl of*  
37 *Operational Research* 130 (2001) 169-189  
38  
39 62. Flatley Brennan, P Bakken, A (2015) Nursing Needs Big Data and Big Data  
40 Needs Nursing, *Journal of Nursing Scholarship* 2015 47:5 477-484  
41  
42 63. Li, S., Pittman, P., Han, X. and Lowe, T. J. (2017), Nurse-Related Clinical  
43 Nonlicensed Personnel in U.S. Hospitals and Their Relationship with Nurse  
44 Staffing Levels. *Health Serv Res*, 52: 422-436. doi:10.1111/1475-6773.12655  
45  
46 64. Miles I, Belousova V, Chichkanov N, (2017) "Knowledge intensive business  
47 services: ambiguities and continuities", *Foresight*, [https://doi.org/10.1108/FS-](https://doi.org/10.1108/FS-10-2017-0058)  
48 [10-2017-0058](https://doi.org/10.1108/FS-10-2017-0058)  
49  
50 65. Grobler A, Zock A (2010) Supporting long term workforce planning with a  
51 dynamic aging chain model-a case study from the service industry *Human*  
52 *Resource Management* 49 (5) 829-848  
53  
54 66. SGSA (2007) *Guide to Safety in Sports Grounds* ISBN 9780117020740 TSO  
55 London  
56  
57 67. Needleman J (2016) Nursing skill mix and patient outcomes *BMJ Qual Safety*  
58 Published Online First: 30 December 2016. doi: 10.1136/bmjqs-2016-006197  
59  
60 68. Smythe E, Spence D (2012) Re-Viewing Literature in Hermeneutic Research  
*International Journal of Qualitative Methods* 2012, 11(1)

1  
2  
3  
4  
5  
6  
7  
8  
9  
10  
11  
12  
13  
14  
15  
16  
17  
18  
19  
20  
21  
22  
23  
24  
25  
26  
27  
28  
29  
30  
31  
32  
33  
34  
35  
36  
37  
38  
39  
40  
41  
42  
43  
44  
45  
46  
47  
48  
49  
50  
51  
52  
53  
54  
55  
56  
57  
58  
59  
60

For peer review only

1  
2  
3  
4  
5  
6  
7  
8  
9  
10  
11  
12  
13  
14  
15  
16  
17  
18  
19  
20  
21  
22  
23  
24  
25  
26  
27  
28  
29  
30  
31  
32  
33  
34  
35  
36  
37  
38  
39  
40  
41  
42  
43  
44  
45  
46  
47  
48  
49  
50  
51  
52  
53  
54  
55  
56  
57  
58  
59  
60

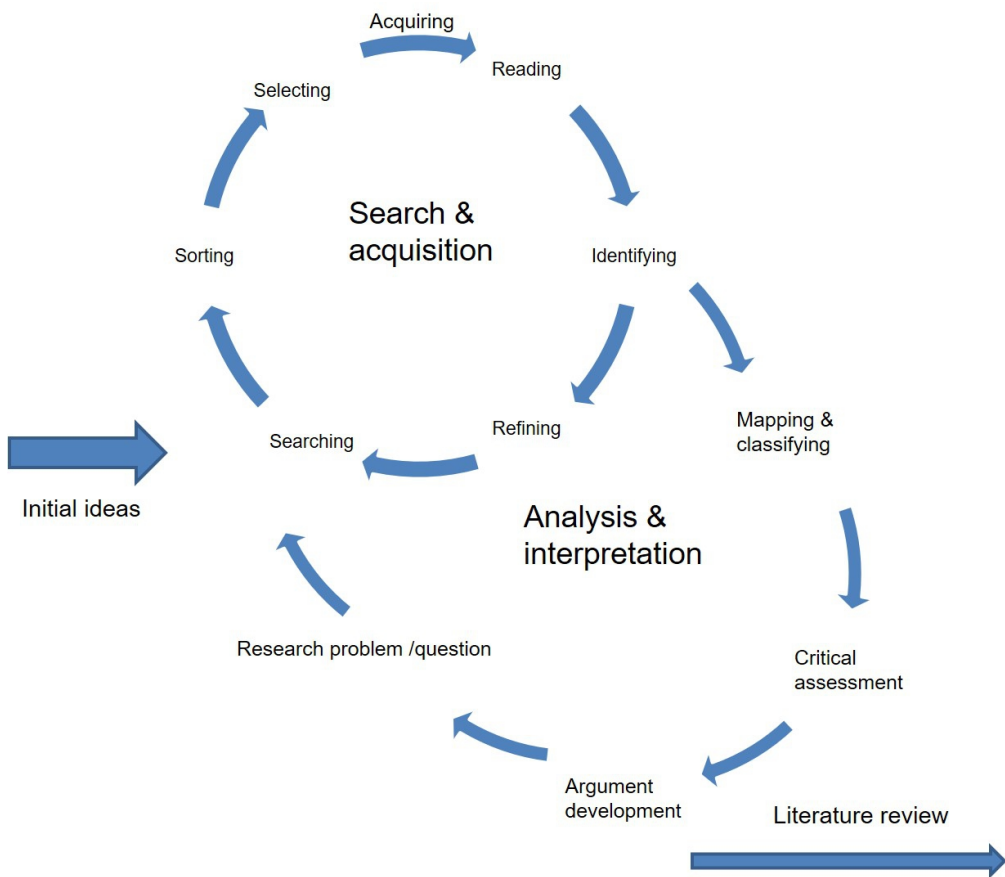

Figure 1

103x90mm (300 x 300 DPI)

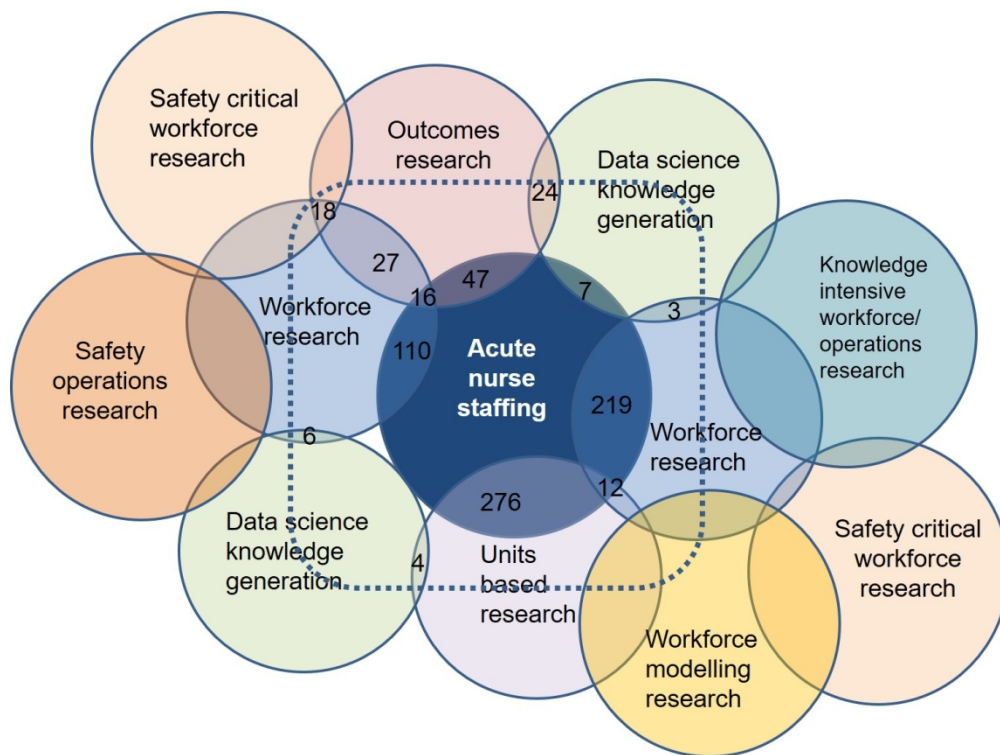

Figure 2

128x95mm (300 x 300 DPI)



Figure 3

121x84mm (300 x 300 DPI)

## Supplementary file

### Search Strategy

#### *Database selection*

PubMed, CINAHL, arXiv, CiteSeerX, IEEEExplore

#### *Key words/terms (Boolean)*

“nursing” arXiv, CiteSeerX, IEEEExplore (as this is a minority term) “nurse staffing” “nurse workload” “hospital staffing” “nursing ratios” “safe staffing” “staffing” AND “patient safety” in PubMed and CINAHL

#### Criteria for inclusion

Primary research, secondary analysis or reviews on any relationship between acute hospital nurse staffing (registered, licenced and unregistered) and an specified outcome.

#### First iteration

##### 7323 items

Exclude opinion pieces, editorials, commentaries and proceedings, professional opinion, consensus pieces (5281)

Exclude papers with no English translation (47)

Include systematic reviews (24)

Include primary research (2034)

##### 2054 Items

Exclude other non-peer reviewed work such as reports (23)

Exclude papers which did not meet criteria on reading abstract/full text (1262)

#### Papers reviewed 769

Mapping and classification by discipline/area of research, major concepts, lens and unit of analysis

Critical assessment of the work was for rigour/associations and primarily “gap spotting” To visualise the relationships within discipline areas a Venn diagram was constructed (Figure 2). With the further application for example of Łoś's Theorem, and ultra product could eventually be defined.

#### Second iteration

Search to same criteria adding Nursing AND knowledge intense occupations, safety critical workforce revealed opinion pieces which referenced the terms to describe the labour market but no additional papers reviewed as they did not meet the criteria.

# BMJ Open

## Determining acute nurse staffing, a hermeneutic review of an evolving science.

|                                 |                                                                                                 |
|---------------------------------|-------------------------------------------------------------------------------------------------|
| Journal:                        | <i>BMJ Open</i>                                                                                 |
| Manuscript ID                   | bmjopen-2018-025654.R2                                                                          |
| Article Type:                   | Research                                                                                        |
| Date Submitted by the Author:   | 28-Feb-2019                                                                                     |
| Complete List of Authors:       | Leary, Alison; London South Bank University<br>Punshon, Geoffrey; London South Bank University, |
| <b>Primary Subject Heading</b>: | Health services research                                                                        |
| Secondary Subject Heading:      | Nursing                                                                                         |
| Keywords:                       | Nursing, Staffing, Skillmix, Education, Safety, Modelling                                       |
|                                 |                                                                                                 |

SCHOLARONE™  
Manuscripts

1  
2  
3 **Title: Determining acute nurse staffing, a hermeneutic review of an evolving**  
4 **science.**  
5

6 **Correspondence to**

7  
8 **Prof Alison Leary PhD RN**

9  
10 **London South Bank University**

11  
12 **School of Health & Social Care**

13  
14 **103 Borough Rd London SE1 0AA**

15  
16 **alisonleary@yahoo.com**  
17  
18  
19

20  
21 **Dr Geoffrey Punshon**

22  
23 **London South Bank University**

24  
25 **School of Health & Social Care**

26  
27 **103 Borough Rd London SE1 0AA**

28  
29 **punshongeoff@yahoo.co.uk**  
30  
31  
32

33  
34 **Competing interests**

35  
36 **There are no competing interests. This review is unfunded.**  
37  
38  
39

40  
41 **Key words**

42  
43 **Staffing, Safety, Nursing, Skillmix, education, modelling, hermeneutics**  
44  
45

46  
47 **Word count 4252**  
48  
49  
50  
51  
52  
53  
54  
55  
56  
57  
58  
59  
60



## Abstract

### Background

Calculating nurse staffing in the acute hospital has become a key issue but solutions appear distant. Community, mental health and areas such as learning disability nursing have attracted less attention and remain intractable. This review aims to examine current approaches to the issue across many disciplines.

### Design

The approach taken is iterative and in the form of a hermeneutic review. 769 pieces of evidence were reviewed from across disciplines such as nursing, medicine, engineering, statistics, population science, computer science and mathematics where hospital nurse staffing was the subject of the study.

### Results

A number of themes emerged. The first iteration showed the predominance of unit base approaches (e.g. nurse numbers, ratios, activity and workload) the second was the development of methodologies. Subsequent iterations examined issues such as demand, safety, nurse education, turnover, patient outcomes, patient or staff satisfaction, workload and activity. The majority of studies examined (n=767) demonstrated some association between staffing (units or type/skill) and various factors such as staff or patient satisfaction, working conditions, safety parameters, outcomes complexity of work achieved, work left undone or other factors. Many potential areas such as operational safety research were not utilised.

### Conclusion

Although the relationship between staffing in acute care and factors such as units, safety or workload is complex, the evidence suggests an interdependent relationship which should only be dismissed with caution. The nature of these relationships should be further examined in order to determine nurse staffing. The body of knowledge appears substantial and complex yet appears to have little impact on policy.

### Strengths and limitations of this study

This is a review of the existing literature across many fields and focuses on cross disciplinary approaches.

By encompassing many fields breadth rather than depth limits the analysis.

This study suggests looking at the issue of safe staffing from a wider operational safety perspective could uncover additional insight and solutions.

## Funding Statement

This research received no specific grant from any funding agency in the public, commercial or not-for-profit sectors.

## Competing interests

There are no competing interests.

## Data sharing agreement

All of the papers reviewed are in the public domain.

## Introduction

The question of registered nurses staffing hospitals to a level that is safe, high quality and cost effective has become a key issue worldwide. In terms of research it has also become something of a Gordian knot-one that attracts many attempts to solve but few solutions. Extending this question to community nursing and areas such as mental health or learning disability nursing demonstrate the complexity of the problem. Fundamental questions such as “How many nurses are needed?” “What kind of skill mix?” “Are staffing ratios the solution?” remain largely unanswered.

These issues present interesting theoretical problems but they have a very real world application as they underpin the safety of patients both in hospital and community. It could be argued that nursing is only visible by its absence such as those reported by Francis in the enquiry into the deaths at Mid Staffordshire NHS Foundation trust<sup>1</sup>. Nursing is the largest part of the healthcare workforce<sup>2</sup> and attempts to curtail costs have seen radical workforce changes including reducing the number of registered nurses or replacing them with assistive personnel (Needleman 2016). It is of interest that there have been a number of coroners commenting on staffing levels under section 28 of the Coroners & Justice Act 2009<sup>3</sup>. This allows a Coroner in England to report circumstances where it may prevent further deaths. There are several examples of this for both the acute and care home sectors in recent years<sup>4</sup>.

Issues of staffing are further complicated by a lack of consensus within the profession around the levels of care that should be provided or calculated. Is there a difference between safe care and good care? Should all care be given by a registered nurse (RN)? Certainly, policy decisions in England are promoting the transfer of care to assistive personnel such as Nursing Associates<sup>5</sup> for a variety of reasons such as shortage of RNs and increasing costs. Financial burden is a primary driver of workforce determinants. Investing in one aspect of staffing often means scaling back elsewhere, resulting in “trade-offs” for example using less educated staff or changing nurse patient ratios<sup>6</sup>.

1  
2  
3 Different countries within the UK are taking different policy positions on staffing  
4 which varies from guidance in England to legislation in Scotland and Wales<sup>7</sup>.  
5

6  
7 In order to make sense of the variation in published work a hermeneutic approach is  
8 taken. Such an approach is to question and to remain open to what might be  
9 revealed<sup>8</sup>. Different researchers have used different approaches to understand  
10 various aspects of this problem and the aim of this work to reveal a deeper  
11 understanding and understand more about the interrelational nature of the problem.  
12 This paper reviews the approaches that have been used to investigate the idea of  
13 safe staffing, the knowledge elicited and explores direction this area of research  
14 might take in the future.  
15  
16  
17

## 18 19 20 **Method**

21  
22 Hermeneutic reviews<sup>9</sup> utilise a process of searching and interpretation as  
23 interrelational activity (Figure 1). This is because the focus is on the understanding  
24 and interpretation of the materials. In a subject with a high volume of literature, this  
25 approach allows the integration of interpretation and analysis of the literature and the  
26 development of searching as part of the review. A hermeneutic framework describes  
27 the literature review process as fundamentally a process of developing  
28 understanding that is iterative in nature<sup>9</sup>. This has allowed a much wider perspective  
29 incorporating a wider search and analysis than for example a systematic review  
30 utilising methods such as PRISMA<sup>10</sup>. This body of evidence uses an extremely  
31 diverse set of methodologies ranging from inductive studies reliant on qualitative  
32 data to areas of computational mathematics. This would make approaches such as  
33 meta-analysis almost impossible.  
34  
35  
36  
37  
38

39 Initial reading indicated that the work on this topic was not limited to the nursing  
40 literature and so the first iteration was to expand the search to areas such as  
41 computer science, maths and engineering. A search of the common databases was  
42 undertaken including those in informatics and computational mathematics (PubMed,  
43 CINAHL, arXiv, CiteSeerX, IEEEXplore) using search terms “nursing” (for computer  
44 science, maths and engineering only as this is a minority term) “nurse staffing”  
45 “nurse workload” “hospital staffing” “nursing ratios” “safe staffing” “staffing” AND  
46 “patient safety” in the past 15 years (2003-2018). All terms were in English. A  
47 successive fractions approach was used to refine this search<sup>9</sup>. Systematic reviews  
48 were included where primary research is available. Initial reading also revealed a  
49 paucity of work in area such as mental health, community care and learning disability  
50 and so the focus remained on acute hospital staffing.  
51  
52  
53  
54

55 This generated 7323 items. A significant proportion of work in the area of nurse  
56 staffing has taken the form of editorials and various types of commentary or opinion  
57 pieces rather than empirical studies. After elimination of opinion pieces and  
58 professional non peer reviewed literature there remained in excess of 700 papers  
59  
60

1  
2  
3 (n=769) across the different disciplines. These were reviewed and have broadly  
4 been themed to gain insight into the different approaches and relational research  
5 used to examine the issue of staffing within a wider context of safety. A  
6 supplementary file contains more detail on how these studies were selected.  
7  
8

### 9 **Patient and public involvement**

10  
11 This is a review of the existing literature and so there was no patient involvement at  
12 this stage. Subsequent iterations would have patients/public co-researchers to co-  
13 create questions and design subsequent studies.  
14  
15

### 16 **Results**

17  
18 In terms of analysis specific themes started to emerge which were anchored around  
19 methodology and the different lenses through which the issue of nurse staffing is  
20 seen. Approaches to the question framed as “how many do we need?” are  
21 commonly approached as units, for example, numbers of workforce, ratios (nurse to  
22 patient or nurse to furniture) unit/ward levels of activity, job (different types of nursing  
23 such as paediatric, theatres or intensive care) or contextually/situationally. It is  
24 interesting to note that some situational perspectives originated from systems  
25 engineering approaches such as Caryaon & Gurses<sup>11</sup> systems engineering approach  
26 in intensive care units.  
27  
28  
29  
30

31 After examining the literature iteratively, a number of themes emerge. Any of these  
32 themes would merit study in their own right, but a broad overview of the different  
33 approaches and their application is given here. What is striking is the range of  
34 approaches used. These range from descriptive studies to the development of  
35 operational mathematical models.  
36  
37  
38

### 39 **Nursing as units, workload or activity.**

40  
41 The literature on the development of a ratio or the effect of nurse to patient ratios is a  
42 common theme in the nursing literature. A meta-analysis by Driscoll<sup>12</sup> draws on 35  
43 studies which show an association between nurse staffing ratios and patient  
44 outcomes. These studies use large administrative data sets and found that higher  
45 staffing levels were associated with reduced mortality, reduced medication errors,  
46 reduction in incidence of pressure ulcers, reduced use of restraint, reduction in  
47 infections, such as hospital acquired pneumonia, higher aspirin use and a greater  
48 number of patients receiving treatment. It is interesting to note that all of these  
49 studies are either cross sectional or point prevalence studies. When examining this  
50 section of the literature, cross sectional studies dominate.  
51  
52  
53  
54

55 Shindul-Rothschild et al<sup>13</sup> notes how workload impacts on efficiency in emergency  
56 departments. Using regression in trauma centres, the time to a diagnostic evaluation  
57 significantly increased when nurses cared for a higher number of patients. Aikens  
58 work on RN 4Cast<sup>14</sup> shows that an increase in a nurses' workload by one patient  
59 increased the likelihood of an inpatient dying within 30 days of admission by 7%.  
60

1  
2  
3 They also found that every 10% increase in bachelor's degree nurses was  
4 associated with a decrease in this likelihood by 7%. These associations imply that  
5 patients in hospitals in which 60% of nurses had bachelor's degrees and nurses  
6 cared for an average of six patients would have almost 30% lower mortality than  
7 patients in hospitals in which only 30% of nurses had bachelor's degrees and nurses  
8 cared for an average of eight patients. Skillmix is also a feature of this body of work.  
9 Graduate RNs are associated with better outcomes while higher registered nurse to  
10 patient ratios or support worker to registered nurse ratios are associated with poorer  
11 outcomes<sup>15</sup>. Diane Boyle's study<sup>16</sup> found that higher Registered Nurse Hours Per  
12 Patient Day (RNHPPD) was associated with improvements in total fall rates over  
13 time. This finding was not unique with various studies exposing the same association  
14 for example Staggs and Dunton<sup>17</sup> found that skillmix of a higher rate of assistive  
15 personnel was associated with an increase in falls but there was variation. On acute  
16 medical units there was a weak association between decrease in falls and increase  
17 in RN staffing, but in step down and medical units the authors concluded that  
18 increasing non RN staffing was ineffective for decreasing falls. Increasing RN  
19 staffing did have a positive impact but this varied by unit type. White et al<sup>18</sup> in  
20 another cross-sectional study (N=353,333) examined a historical dataset using  
21 thirty-day mortality and failure to rescue as endpoints and found that each 10%  
22 increase in the proportion of graduate nurses was associated with 4% lower odds of  
23 death in the older population 10% lower odds of death for those with dementia. This  
24 was associated with better odds of rescue where graduate nurses are deployed.  
25  
26  
27  
28  
29  
30  
31  
32

33 Relationships between staffing factors and outcomes are complex<sup>19,20,21</sup> and the  
34 causal relationship is not fully understood. However we know from other studies that  
35 there is a deficit in care if staffing is not adequate. For example, in a study by Ball et  
36 al<sup>22</sup> nurses (86%) reported that one or more care activity had been left undone due  
37 to lack of time on their last shift. Most care frequently left undone were: comforting or  
38 talking with patients (66%), educating patients (52%) and developing/updating  
39 nursing care plans (47%). The odds of care being left undone halved when nurses  
40 had six or less patients to care for. The work left undone has become a more specific  
41 area of enquiry with more authors coming to essentially the same conclusions<sup>23</sup>.  
42 Missed care appears to be common and perhaps even predictable. The work of  
43 Bragadottir et al<sup>24</sup> examined the correlates and predictors of missed nursing care in  
44 hospitals using regression. Such approaches may contribute to future demand based  
45 models.  
46  
47  
48  
49  
50

51 A substantial body of evidence has been built which uses the approach of nurses,  
52 nursing care or patients as units of work activity.  
53

54 Many factors contribute to workload and the relationship with safety is frequently  
55 investigated. Adequate staffing and resources, administrative support, and  
56 collaborative workplace relationships have been shown to improve patient safety,  
57 and factors such as low job satisfaction, staff turnover, and high workload increase  
58 risk to patient safety<sup>25,26</sup>.  
59  
60

1  
2  
3 Nursing workload is subjected to “measurement” using a plethora of measurement  
4 tools which numerate tasks. Most of these tools tend to view nursing workload as  
5 countable tasks, which is likely to be an oversimplification of complex work. Such  
6 tools do not recognise the ‘other’ work which nurses do related to workplace culture  
7 and climate<sup>27</sup>. Fasoli & Haddock<sup>28</sup> after an extensive review of nurse workload  
8 classification systems, reported there was no gold standard system for doing this  
9 and current measures were not sensitive enough. This is reflected in findings that the  
10 data collected routinely by nurses is not of sufficient quality to perform such complex  
11 modelling<sup>17,29,30</sup>.

12  
13  
14  
15  
16 There has been a preoccupation with “time and motion” studies but these are of  
17 limited use in complex work<sup>31,32</sup> as a result this method cannot handle relational  
18 work<sup>33</sup> and is therefore likely to underestimate nursing workload.

19  
20  
21 There are measures which consider the complexity of the work<sup>34</sup> and workload  
22 emerged as a theme including systematic reviews of the effect of workload on  
23 patient safety<sup>35,11</sup>. Several inductive subgroups emerged including the role of  
24 workload and subsequent delegation of tasks which leads to delegation of safety  
25 critical activity such as vital signs monitoring for example how local modifications to  
26 track and trigger systems can reduce accuracy the of predictive algorithms<sup>36</sup> or the  
27 workplace environment as a factor of workload<sup>37</sup>.

28  
29  
30  
31 There has been some examination of redistribution of workload<sup>38</sup> in which there has  
32 been some measurable increase in clinical time by workload redistribution. Although  
33 this review does not consider the costs of staffing there are some interesting papers  
34 on this. Perhaps one of the most interesting is Newbold’s 2008 model<sup>39</sup> which used  
35 Aiken’s 2003<sup>40</sup> study, looked at nurse levels of education and patient mortality in  
36 terms of a trade-off: what would a cost/mortality look like. Other researchers have  
37 also utilised the cross sectional work to iterate mathematical models with some  
38 success.  
39  
40  
41  
42  
43  
44

## 45 **Workforce**

46  
47 Levels of workforce skill and education also feature in the literature. Much of the  
48 work linking staffing (units or education) to outcomes looks at specific aspects of  
49 care or harm. Boyle et al<sup>16</sup> found an association between speciality nursing  
50 education (post registration certification) and improvement in the rates of falls using  
51 a longitudinal model (903 hospitals over 6 years) which echoed the findings of  
52 Kendall-Gallagher & Blegen<sup>41</sup>, Lange et al<sup>42</sup> and Boltz et al<sup>43</sup>. For example, the Lang  
53 paper found that units staffed with two or more geriatric-certified nurses had  
54 significantly lower fall rates than units with one or no geriatric-certified nurses<sup>42</sup>.  
55  
56 There appears to be a body of evidence supporting a higher skilled educated  
57 workforce as associated with less harm although it is interesting to note that Magnet  
58 hospitals were associated with higher rates of falls<sup>44</sup>. There are numerous papers  
59  
60

1  
2  
3 linking RN staffing with patient outcomes/harm but fewer on education. One  
4 interesting single centre study looked at the consequences of outlying patients to  
5 non-specialist wards which was associated with an increase in mortality<sup>45</sup>.  
6  
7

8 In a recent systematic review<sup>46</sup> eighteen studies were examined which gave  
9 subjective reports of missed care. 75% or more nurses reported omitting some care.  
10 Fourteen of these studies found low nurse staffing levels were significantly  
11 associated with higher reports of missed care. There was little evidence that adding  
12 support workers to the team reduced this. The authors noted that the extent to which  
13 the relationships observed link to outcomes has yet to be investigated.  
14  
15

16 Other work suggests that adding assistive nursing personnel without professional  
17 nurse qualifications may contribute to preventable deaths, erode quality and safety of  
18 hospital care<sup>14</sup>. Where studies have explored the impact of second level nurses,  
19 similar to enrolled nurse qualification, the evidence is not supportive of the role<sup>47</sup>.  
20  
21

22 Satisfaction with work and other factors such as environmental, workload, working  
23 hours and effect of skill mix is also reported as a factor. In some cases there is  
24 evidence of an association between shift length, staff satisfaction and patient  
25 outcomes<sup>48</sup> which associated longer shifts with more care left undone. These studies  
26 usually take the form of cross sectional surveys as there appears to be no routine  
27 data collection of these data. Unlike the concepts of staffing, there is much more  
28 consistency in the reporting of issues related to workload such as moral distress,  
29 burn out and compromise of both personal and professional values including the  
30 erosion of identity<sup>49</sup>. The corollary of this also occurs in that papers describing moral  
31 distress also cite inadequate staffing as a causative attribute<sup>50</sup>.  
32  
33  
34  
35

36 Staffing and turnover is also occasionally reported in terms of outcomes for example  
37 turnover and patient outcomes. In 2014 Park et al<sup>51</sup> examined episodic unit-level  
38 data from 2008 to 2010. This study examined 10,935 unit-quarter observations  
39 (2,294 units, 465 hospitals) using multilevel regression. They found that the effect of  
40 RN turnover on unit-acquired pressure ulcers was significant and “lagged” in terms of  
41 time. For every 10 percentage-point increase in RN turnover in a quarter, the odds of  
42 a patient having a pressure ulcer increased by 4 percent in the next quarter. Higher  
43 RN turnover in a quarter was associated with lower RN staffing in the current and  
44 subsequent quarters. Higher RN staffing was associated with lower pressure ulcer  
45 rates, but it did not mediate the relationship between turnover and pressure ulcers.  
46  
47  
48  
49

50 There appears to be a growing body of literature which examines resilience. The  
51 emotional labour of nursing involves managing the emotional demands of nursing  
52 work. An integrative review by Delgado et al<sup>26</sup> identified the difficult nature of not only  
53 the work but the opportunities, or lack of, to build personal resilience.  
54  
55  
56

57 Alves et al<sup>52</sup> found that RNs nurses with greater autonomy, good working  
58 relationships and control over their work environment had lower levels of emotional  
59 exhaustion, higher job satisfaction, less intention of leaving. Although they did not  
60

1  
2  
3 associate findings with patient outcomes these and other authors have found  
4 positive associations with autonomy and rescue rates and mortality-and they are  
5 more likely to experience this in small and non-teaching hospitals<sup>53</sup>. This a consistent  
6 theme in the literature reflected in a scoping review of twelve studies<sup>54</sup> which  
7 concludes that structural empowerment effects the quality of care and patient safety  
8 in hospital. This is also reflected in perceptions of safety culture and outcomes.  
9 When adequate resource is allocated in terms of staffing the perception of safety and  
10 patient satisfaction improves<sup>55</sup>.  
11  
12  
13  
14  
15  
16

### 17 **Understanding the complex relationship**

18  
19 There were a number of studies that used various aspects of data science. These  
20 ranged from Bayesian approaches<sup>56</sup>, to systems thinking, modelling, computational  
21 mathematics and approaches such as machine learning. Many of these papers  
22 appeared outside of the nursing literature and were located via databases that serve  
23 the physical sciences, engineering and mathematics.  
24  
25

26 This includes work such as Aickelin et al<sup>57</sup>, who developed a memetic evolutionary  
27 algorithm to achieve explicit learning in rule-based nurse rostering, which involves  
28 applying a set of heuristic rules for each nurse's assignment. This uses a set of  
29 building blocks in terms of data and rules to build an Estimation of Distribution  
30 Algorithm (EDA). As the authors point out, although this performs well in some "real  
31 world" situations it is limited by its ability to learn-one of the solutions is to add more  
32 nurses to the model without understanding that this might be a constraint.  
33  
34  
35

36 Pitkaaho et al<sup>58</sup> used Finnish data from over 35,000 episodes of care to determine  
37 relationships between nurse staffing and patients' length of stay in acute care units  
38 and to determine whether non-linear relationships exist between variables using a  
39 Bayesian approach. They found that acuity was the overriding factor that connected  
40 all eleven variables in the dependency network of nurse staffing and short length of  
41 stay. Non-linear associations were found between short length of stay and the  
42 proportion of RNs. Skill mix consisting of an average proportion of Registered  
43 Nurses (65–80%) was conducive to a short length of stay and predicted a 66%  
44 likelihood of short length of stay. Lower percentages of RN predicted lower likelihood  
45 of short length of stay.  
46  
47  
48  
49

50 An overriding theme in these approaches are challenges in the real world. Well-  
51 constructed approaches to calculating staffing needing more work than authors  
52 anticipated when tested in reality. This is not unusual-these approaches tend to be  
53 iterative, however it is interesting to note that a number of these approaches  
54 concluded that previous staffing models had underestimated ratios and staffing  
55 requirements in areas examined such as recovery<sup>59</sup>.  
56  
57  
58  
59  
60



1  
2  
3 Other authors such as Park<sup>60</sup> are now building more optimized models based on  
4 operational mathematical approaches and are likely to yield a more comprehensive  
5 approach to the problem of computing staffing and outcomes as they accommodate  
6 complexity.  
7  
8

9 Data science approaches were the only ones to consider knowledge stock or  
10 knowledge flow in the early part of the 21<sup>st</sup> century but little consideration was given  
11 to this after this time<sup>61</sup>.  
12  
13

14 The advent of data science offers many opportunities however nursing may not be  
15 placed to capitalise on them<sup>62</sup>. Lack of high quality data is a recurring issue in terms  
16 of both unit based approaches and approaches using data science to examine  
17 complexity. Nursing data is generally episodic and lacks sensitivity to the activity that  
18 nurses perform. In the studies, most informatics systems use taxonomies or lists of  
19 tasks which are limited and show no apparent relationship with time taken. Another  
20 issue is the dominance of supply side (nurse units of time for example) and not the  
21 demand from patients which is rarely looked at.  
22  
23  
24

### 25 **Refining and leaving the hermeneutic circle**

26  
27 A key facet of Gadamer's<sup>8</sup> approach is not to leave the hermeneutic circle due to its  
28 inescapability and as such the review has focussed on the search. However the  
29 authors are from a positivist paradigm and so has broken the circle at this juncture.  
30 This method is an inductive one and as such recognises that the iterations of  
31 searching and analysis could be infinite. The themes that emerge here across the  
32 literature are not exhaustive but provide a break in the cycle of searching and  
33 analysis. The exploration of these themes can be further built up. The papers  
34 reviewed offered many directions in which to expand this area of enquiry and these  
35 are shown in Figure 2, a Venn diagram of the areas explored, the numbers of papers  
36 reviewed and potential for intersection with areas of knowledge not reviewed herein.  
37  
38  
39  
40  
41

### 42 **Discussion**

43  
44 Although the evidence in the nursing literature appears to offer no firm guidance on  
45 staffing models or absolute solutions, this could be seen as reassurance because it  
46 also demonstrates the complexity of the problem. The literature describes different  
47 associations between various factors such as outcomes and staffing numbers/skill  
48 mix. Each piece of work gives a slightly different perspective but an overarching  
49 emerging theme is that a relationship does exist between different factors even if  
50 these relationships are not fully understood, there is an apparent effect.  
51  
52  
53

54 The conceptual difficulty safety presented in the context of staffing was an emerging  
55 theme. How is safe differentiated from unsafe, what is optimal staffing and where  
56 should trade off occur. These studies help with clarification of the problem but there  
57 is little consistency in this body of work in terms of a solution.  
58  
59  
60

1  
2  
3 One of the themes herein was the repeated association with not only numbers of  
4 RNs but the educational level in the workplace. This appeared to show an overall  
5 benefit in employing RNs and also RNs with a degree level qualification. Some  
6 authors note this in the employment marketplace-that employers are acting on these  
7 findings and recording a downward trend in using assistive roles in the USA<sup>63</sup>.  
8  
9

10 It is interesting that only one paper mentioned knowledge stock and knowledge flow.  
11 None of the papers reviewed examined nurse staffing in terms of being a knowledge  
12 intense occupation which is a factor in modelling workforces in other safety critical  
13 industries or in other fields where operations are highly reliant on professional  
14 knowledge such information technology<sup>64</sup>. This might be because the approach to  
15 workforce modelling in nursing is focussed on linear, deterministic approaches such  
16 as time and motion or time filled with tasks. This is more akin to workforce modelling  
17 in the service industries<sup>65</sup>.  
18  
19  
20  
21

22 There is narrative which focusses on a fixed ratio as staffing model in nursing. Ratios  
23 are common in other safety critical industries or area such as mass gatherings  
24 however it is often used as a failsafe rather than a staffing model<sup>66</sup> which might be a  
25 more practical option for nursing.  
26  
27

28 The literature is supportive of a relationship between staffing, skillmix and education  
29 and this has been reviewed before<sup>67</sup> however circling out beyond the nursing  
30 literature affirms this. Many reviews or policy documents appear to be confined to the  
31 nursing or medical literature and yet a rich seam of enquiry appears outside of these  
32 fields. What is striking is that there was very little overlap in areas of enquiry such as  
33 safety critical operations research, demand modelling or knowledge based workforce  
34 research and acute nurse staffing (Figure 2). These areas show in the Venn diagram  
35 (Figure 2) as a representation of the sets of knowledge reviewed and those not  
36 reviewed specifically but where these different fields appear to intersect.  
37  
38  
39

40 Researchers should widen their perspectives on methodologies and approaches to  
41 include other disciplines particularly the approaches of safety critical industries. By  
42 doing so it is possible to iterate an initial understanding of demand which can begin  
43 to integrate areas such as workforce and safety-an interpretation is given in Figure 3.  
44  
45

### 46 **Strengths and limitations of this study**

47

48 This is a review of the existing literature across many fields and focuses on cross  
49 disciplinary approaches. By encompassing many fields, breadth rather than depth  
50 limits the analysis but does take the literature in context to form an overall view.  
51 There is a risk of over simplifying the literature and the knowledge at this scale.  
52  
53  
54  
55

### 56 **Conclusion**

57

58 There is a wide variety of literature from different paradigms that support a complex  
59 interrelationship between different factors in acute nurse staffing. Despite a growing  
60

1  
2  
3 body of knowledge, there appears to be little reference to nursing as safety critical  
4 nor is the problem viewed through this lens. It is suggested that looking outside the  
5 discipline of nursing might add valuable insight to this problem.  
6  
7

8 The issue of nurse staffing is a complex one and the relationships between factors  
9 such as nursing and patient outcomes is also complex. Despite this no papers  
10 examined nursing as a knowledge intensive operation or as a safety critical  
11 workforce. There is an increasing body of knowledge outside of nursing which has  
12 focussed on this topic but is rarely utilised.  
13  
14

15 Although this is an emerging area, evidence repeatedly suggested a complex  
16 interdependent relationship between nurse staffing and various factors such as  
17 patient safety. Hermeneutic approaches can offer new insight by focussing in  
18 interpretation and has been used to generate knowledge<sup>68</sup>.  
19  
20

21 Given the asserted complexity of work, time and motion or other simplistic activity  
22 analysis (measuring nursing in a linear or deterministic way) should be avoided. The  
23 importance of this emerging relationship should be considered when examining  
24 staffing. This study suggests looking at the issue of safe staffing from a wider  
25 operational safety perspective could uncover additional insight and solutions.  
26  
27  
28  
29  
30

### 31 **Ethical Permissions**

32  
33 This is a review of the literature. Ethical permission was not sought.  
34

### 35 **Author's contribution**

36  
37 AL design, analysis, writing, GP analysis and writing.  
38  
39

### 40 **Acknowledgements**

41  
42 The authors would like to acknowledge Dr M Alexander for help in identifying cases  
43 from the coroner. Dr Elaine Maxwell for help in formulating the area of enquiry.  
44  
45

### 46 **Figure Legends**

47  
48 Figure 1 The hermeneutic circle as a framework for literature reviews

49  
50 Figure 2 A Venn diagram of areas of enquiry and potential overlap with other  
51 interdisciplinary areas-the bordered area contains the literature reviewed  
52

53  
54 Figure 3 Contextualising the findings in terms of demand  
55  
56

### 57 **References**

58  
59  
60

1. Francis R (2013) The Mid Staffordshire NHS Foundation Trust Public Inquiry. Report of the Mid Staffordshire NHS Foundation Trust Public Inquiry: Executive Summary. London: Stationery Office.
2. NHS Digital (2017) Nurse & health visitor-numbers September 2012 to 2017 <https://digital.nhs.uk/article/8471/Nurse-health-visitor-numbers-September-2012-to-2017> Accessed February 2018
3. Ministry of Justice (2013) *Coroners & Justice Act 2009; Coroners (Investigation) Regulations 2013 Regulation 28: report to prevent future deaths* HM Government
4. Office of the Coroner, District of Hertfordshire (2013). *Section 28 and Letter in the case of John Gwynfryn MORRIS, deceased* <https://www.judiciary.gov.uk/wp-content/uploads/JCO/Documents/coroners/pfds/care-home/Morris+2013-0295.pdf> Accessed March 2018
5. Health Education England (2015) Raising the Bar Shape of Caring: A Review of the Future Education and Training of Registered Nurses and Care Assistants <https://www.hee.nhs.uk/sites/default/files/documents/2348-Shape-of-caring-review-FINAL.pdf> Accessed March 2018
6. Berkow, S; Vonderhaar K, Stewart J, Virkstis K Terry A (2014) Analyzing Staffing Trade-Offs on Acute Care Hospital Units *Journal of Nursing Administration*: October 2014 - Volume 44 - Issue 10 - p 507–516
7. Welsh Government (2015). Nurse Staffing Levels Act 2016. Cardiff: HM Welsh Government
8. Gadamer, H.G., (1975) *Truth and method*. Seabury, New York
9. Boell SK, Cecez-Kecmanovic D (2014) A hermeneutic approach for conducting literature reviews and literature searches. *CAIS*, Volume 34, Article 12, pp. 257-286, January 2014.
10. Moher D, Liberati A, Tetzlaff J, Altman DG, The PRISMA Group (2009). Preferred Reporting Items for Systematic Reviews and Meta-Analyses: The PRISMA Statement. *PLoS Med* 6(7): e1000097. doi:10.1371/journal.pmed1000097
11. Carayon P, Gurses A (2005) Nursing workload and patient safety in intensive care units: a human factors engineering evaluation of the literature. *Intensive Crit Care Nurs*. 2005;21:284–301.
12. Driscoll, A Grant, M, Carroll, D, Dalton, S, Deaton, C, Jones, I, Lehwaldt, D, McKee, G Munyombwe, T, Astin, F (2017) The effect of nurse-to-patient ratios on nurse-sensitive patient outcomes in acute specialist units: a systematic review and meta-analysis *European Journal of Cardiovascular Nursing* Volume: 17 issue: 1, page(s): 6-22
13. Shindul-Rothschild J Read CY Stamp KD Flanagan J (2016) Nurse Staffing and Hospital Characteristics Predictive of Time to Diagnostic Evaluation for Patients in the Emergency Department *Journal of Emergency Nursing* Volume 43, Issue 2, Pages 138–144

14. Aiken LH, Sloane D, Griffiths P, et al (2016) Nursing skill mix in European hospitals: cross-sectional study of the association with mortality, patient ratings, and quality of care *BMJ Qual Safety* Published Online First: 15 November 2016. doi: 10.1136/bmjqs-2016-005567
15. Griffiths P, Ball J, Murrells T, et al (2016) Registered nurse, healthcare support worker, medical staffing levels and mortality in English hospital trusts: a cross-sectional study *BMJ Open* 2016;6:e008751. doi: 10.1136/bmjopen-2015-008751
16. Boyle DK, Cramer E, Potter C et al (2015). Longitudinal association of registered nurse national nursing specialty certification and patient falls in acute care hospitals. *Nurs Res* 2015;64:291–9.
17. Staggs VS E Dunton N (2013) Associations between rates of unassisted inpatient falls and levels of registered and non-registered nurse staffing *International Journal for Quality in Health Care*, Volume 26, Issue 1, 1 February 2014, Pages 87–92
18. White, E. M., Smith, J. G., Trotta, R. L. and McHugh, M. D. (2018), Lower Postsurgical Mortality for Individuals with Dementia with Better-Educated Hospital Workforce. *J Am Geriatr Soc*. doi:10.1111/jgs.15355
19. Ebricht P Patterson ES, Chalko BA, Render ML (2003) Understanding the complexity of registered nurse work in acute care settings. *Journal of Nursing Administration* 2003 Dec;33(12):630-8
20. Leary A, Cook R, Jones S, Smith J, Gough M, Maxwell E, Punshon G, Radford M (2016) Mining routinely collected acute data to reveal non-linear relationships between nurse staffing levels and outcomes. *BMJ Open* 6(12),e011177
21. Huber E., Kleinknecht-Dolf M., Müller M., Kugler C. & Spirig R. (2017) Mixed-method research protocol: defining and operationalizing patient-related complexity of nursing care in acute care hospitals. *Journal of Advanced Nursing* 73(6), 1491–1501. doi: 10.1111/jan.13218
22. Ball J, Murrells T, Rafferty AM, Morrow E, Griffiths P (2014) Care left undone' during nursing shifts: associations with workload and perceived quality of care *BMJ Qual Safety* 2014 Feb;23(2):116-25
23. Recio-Saucedo A, Dall'Ora C, Maruotti A, et al. What impact does nursing care left undone have on patient outcomes? Review of the literature. *J Clin Nurs*. 2017 Aug 31; [Epub ahead of print]
24. Bragadóttir, H., Kalisch, B. J. and Tryggvadóttir, G. B. (2017), Correlates and predictors of missed nursing care in hospitals. *J Clin Nurs*, 26: 1524-1534. doi:10.1111/jocn.13449
25. Hui-Ying Chiang, H., Hsiao, Y., and Lee, H (2017) Predictors of hospital nurses' safety practices, work environment, workload, job satisfaction, and error reporting. *Journal of Nursing Care Quality*. 2017; 32: 359–368
26. Delgado, C., Upton, D., Ranse, K., Furness, T., and Foster, K. (2017) Nurses' resilience and the emotional labour of nursing work: an integrative review of empirical literature. *International Journal of Nursing Studies*. 2017; 70: 71–88

- 1
- 2
- 3 27. Ross, C Rogers C (2017) RN? Registered or rubber nurse? *Collegian*,
- 4 Volume 24, Issue 6, 551 - 555
- 5
- 6 28. Fasoli, D.R., Fincke, B., & Haddock, K.S. (2011). Going beyond patient
- 7 classification systems to create an evidence based staffing methodology.
- 8 *Journal of Nursing Administration*, 41(10), 434-439
- 9
- 10 29. Leary A, Tomai B, Swift A, Woodward A, Hurst K (2017) Nurse staffing levels
- 11 and outcomes - mining the UK national data sets for insight. *Int J Health Care*
- 12 *Qual Assur.* 2017 Apr 18;30(3):235-247. doi: 10.1108/IJHCQA-08-2016-0118.
- 13
- 14 30. Keenan GM, Lopez KD, Sousa VEC, Stifter J, Macieira TGR, Boyd AD, Yao
- 15 Y, Herdman TH, Moorhead S, McDaniel A, Wilkie DJ (2018) A Shovel-Ready
- 16 Solution to Fill the Nursing Data Gap in the Interdisciplinary Clinical Picture *Int*
- 17 *J Nurs Knowl.* 2018 Jan;29(1):49-58. doi: 10.1111/2047-3095.12168. Epub
- 18 2017 Jan 16. PMID: 28093877
- 19
- 20 31. De Leon E. Industrial psychology. London: Rex Publishing, 1993
- 21
- 22 32. Raiborn CA (2004). Managerial accounting. Melbourne, Australia: Nelson
- 23 Thomson Learning, 2004
- 24
- 25 33. Malloch K (2015) Measurement of Nursing's Complex Health Care Work:
- 26 Evolution of the Science For Determining the Required Staffing For Safe and
- 27 Effective Patient Care July 2015 *Nursing economics* 33(1):20-25
- 28
- 29 34. Junttila, J.K., Koivu, A., Fagerström, L., Haatainen, K., and Nykänen, P.
- 30 Hospital mortality and optimality of nursing workload: a study on the predictive
- 31 validity of the RAFAELA nursing intensity and staffing system. *International*
- 32 *Journal of Nursing Studies.* 2016; 60: 46–53
- 33
- 34 35. Lang TA, Hodge M, Olson V, et al. Nurse-patient ratios: a systematic review
- 35 on the effects of nurse staffing on patient, nurse employee, and hospital
- 36 outcomes. *J Nurs Adm.* 2004;34(7–8):326–37.
- 37
- 38 36. McGaughey J, O'Halloran P, Porter S, Trinder J, Blackwood B (2017). Early
- 39 warning systems and rapid response to the deteriorating patient in hospital: A
- 40 realist evaluation. *J Adv Nurs.* 2017;73:3119–3132.
- 41
- 42 37. Simon M, Maben J, Murrells T, Griffiths P. (2016) 'Is single room hospital
- 43 accommodation associated with differences in healthcare-associated
- 44 infection, falls, pressure ulcers or medication errors? A natural experiment
- 45 with non-equivalent controls'. *SAGE Journal of Health Services Research and*
- 46 *Policy*, 21 (3), pp. 147-155.
- 47
- 48 38. Hamilton J, Verrall T, Maben J, Griffiths P, Avis K, Baker G, Teare G. (2014)
- 49 'One size does not fit all: a qualitative content analysis of the importance of
- 50 existing quality improvement capacity in the implementation of Releasing
- 51 Time to Care: the Productive Ward™ in Saskatchewan, Canada'. *BMC BMC*
- 52 *Health Services Research*, 14
- 53
- 54 39. Newbold D. (2008) The production economics of nursing: a discussion paper.
- 55 *International Journal of Nursing Studies* 45(1), 120–128.
- 56
- 57 40. Aiken, L.H. Clarke, SP Cheung, RB Sloane, DM Silber JH (2003) Education
- 58 levels of hospital nurses and patient mortality *Journal of the American Medical*
- 59 *Association*, 290 (2003), pp. 1617-1623
- 60

- 1
- 2
- 3
- 4 41. Kendall-Gallagher D., Blegen M. A. (2009). Competence and certification of
- 5 registered nurses and safety of patients in intensive care units. *American*
- 6 *Journal of Critical Care*, 18, 106– 113. doi:10.4037/ajcc2009487
- 7
- 8 42. Lange J., Wallace M., Gerard S., Lovanio K., Fausty N., Rychlewicz S. (2009).
- 9 Effect of an acute care geriatric educational program on fall rates and nurse
- 10 work satisfaction. *Journal of Continuing Education in Nursing*, 40, 371– 379.
- 11
- 12 43. Boltz M., Capezuti E., Wagner L., Rosenberg M. C., Secic M. (2013). Patient
- 13 safety in medical-surgical units: Can nurse certification make a difference?
- 14 *Medsurg Nursing*, 22, 26– 32, 37
- 15
- 16 44. Boyle D. K., Gajewski B. J., Miller P. A. (2012). A longitudinal analysis of
- 17 nursing specialty certification by Magnet® status and patient unit type. *The*
- 18 *Journal of Nursing Administration*, 42, 567– 573.
- 19
- 20 45. Bai AD, Srivastava S, Tomlinson GA, et al (2018) Mortality of hospitalised
- 21 internal medicine patients bedspaced to non-internal medicine inpatient units:
- 22 retrospective cohort study *BMJ Qual Saf* 2018;27:11-20.
- 23
- 24 46. Griffiths, P., Recio-Saucedo, A., Dall'Ora, C., Briggs, J., Maruotti, A.,
- 25 Meredith, P., Smith, G. B., Ball, J. and The Missed Care Study Group (2018),
- 26 The association between nurse staffing and omissions in nursing care: a
- 27 systematic review. *J Adv Nurs*. Accepted Author Manuscript.
- 28 doi:10.1111/jan.13564
- 29
- 30 47. NNRU (2009) *Policy Plus: Is there a case for the UK nursing workforce to*
- 31 *include grades of qualified nurse other than the registered nurse?* National
- 32 Nursing Research Unit, Kings College London.
- 33 [http://www.kcl.ac.uk/nursing/research/nnru/policy/Policy-Plus-Issues-by-](http://www.kcl.ac.uk/nursing/research/nnru/policy/Policy-Plus-Issues-by-Theme/Whodeliversnursingcare(roles)/PolicyIssue21.pdf)
- 34 [Theme/Whodeliversnursingcare\(roles\)/PolicyIssue21.pdf](http://www.kcl.ac.uk/nursing/research/nnru/policy/Policy-Plus-Issues-by-Theme/Whodeliversnursingcare(roles)/PolicyIssue21.pdf) accessed March
- 35 2018
- 36
- 37
- 38 48. Ball J, Day T, Murrells T, Dall’Ora C, Rafferty A, Griffiths P, Maben J. (2017)
- 39 'Cross-sectional examination of the association between shift length and
- 40 hospital nurses job satisfaction and nurse reported quality measures'. *BioMed*
- 41 *Central BMC Nursing*, 16 (26) doi: 10.1186/s12912-017-0221-7
- 42
- 43 49. Maben J, Latter S, Clark JM (2007) The sustainability of ideals, values and
- 44 the nursing mandate *Nursing Inquiry* 2007 (14) 99-113
- 45
- 46 50. Traynor M (2014) Caring after Francis: moral failure in nursing reconsidered
- 47 *Journal of Research in Nursing* Volume: 19 issue: 7-8, page(s): 546-556
- 48
- 49 51. Park, S H, Boyle, D K, Bergquist-Beringer, S, Staggs, V S, Dunton, N E.
- 50 Concurrent and Lagged Effects of Registered Nurse Turnover and Staffing on
- 51 Unit-Acquired Pressure Ulcers. *Health Serv Res*. 2014 Aug; 49(4): 1205–
- 52 1225.
- 53
- 54 52. Alves D.F.D.S., Silva D.D & Guirardello E.D.B. (2017) Nursing practice
- 55 environment, job outcomes and safety climate: a structural equation modelling
- 56 analysis *Journal of Nursing Management* 25, 46–55.
- 57
- 58 53. van Oostveen C, Vermeulen H (2017) Greater nurse autonomy associated
- 59 with lower mortality and failure to rescue rates *Evidence-Based Nursing*
- 60 2017;20:56.

- 1  
2  
3  
4  
5  
6  
7  
8  
9  
10  
11  
12  
13  
14  
15  
16  
17  
18  
19  
20  
21  
22  
23  
24  
25  
26  
27  
28  
29  
30  
31  
32  
33  
34  
35  
36  
37  
38  
39  
40  
41  
42  
43  
44  
45  
46  
47  
48  
49  
50  
51  
52  
53  
54  
55  
56  
57  
58  
59  
60
54. Goedhart N.S., Van Oostveen C.J., Vermeulen H. (2017) The effect of structural empowerment of nurses on quality outcomes in hospitals: a scoping review *Journal of Nursing Management* 25, 194–206
55. Smith, S. A., Yount, N., & Sorra, J. (2017). Exploring relationships between hospital patient safety culture and Consumer Reports safety scores. *BMC Health Services Research*, 17, 143. <http://doi.org/10.1186/s12913-017-2078-6>
56. Li J and Aickelin U (2006): '*Bayesian Optimisation Algorithm for Nurse Scheduling*', *Scalable Optimization via Probabilistic Modeling: From Algorithms to Applications Studies in Computational Intelligence*, edited by M Pelikan, K Sastry and E Cantú-Paz, Chapter 17, pp 315-332, Springer
57. Aickelin, U., Burke, E. & Li, J. *J Oper Res Soc* (2007) 58: 1574. <https://doi.org/10.1057/palgrave.jors.2602308> Accessed September 2017
58. Pitkäaho T., Partanen P., Miettinen M. & Vehviläinen-Julkunen K. (2015) Non-linear relationships between nurse staffing and patients' length of stay in acute care units: Bayesian dependence modelling. *Journal of Advanced Nursing* 71(2), 458–473. doi: 10.1111/jan.12550
59. Siddiqui S, Morse E, Levin S (2017) Evaluating nurse staffing levels in perianesthesia care units using discrete event simulation *Transactions in Healthcare Systems Engineering* 7:4, 215-223
60. Park C.S.-Y. (2017) Optimizing staffing, quality, and cost in home healthcare nursing: theory synthesis. *Journal of Advanced Nursing* 73(8), 1838–1847
61. Bordoloi SK Matsuo H (2001) Human resource planning in knowledge intensive operations-a model for learning with stochastic turnover *Eur Jnl of Operational Research* 130 (2001) 169-189
62. Flatley Brennan, P Bakken, A (2015) Nursing Needs Big Data and Big Data Needs Nursing, *Journal of Nursing Scholarship* 2015 47:5 477-484
63. Li, S., Pittman, P., Han, X. and Lowe, T. J. (2017), Nurse-Related Clinical Nonlicensed Personnel in U.S. Hospitals and Their Relationship with Nurse Staffing Levels. *Health Serv Res*, 52: 422-436. doi:10.1111/1475-6773.12655
64. Miles I, Belousova V, Chichkanov N, (2017) "Knowledge intensive business services: ambiguities and continuities", *Foresight*, <https://doi.org/10.1108/FS-10-2017-0058>
65. Grobler A, Zock A (2010) Supporting long term workforce planning with a dynamic aging chain model-a case study from the service industry *Human Resource Management* 49 (5) 829-848
66. SGSA (2007) *Guide to Safety in Sports Grounds* ISBN 9780117020740 TSO London
67. Needleman J (2016) Nursing skill mix and patient outcomes *BMJ Qual Safety* Published Online First: 30 December 2016. doi: 10.1136/bmjqs-2016-006197
68. Smythe E, Spence D (2012) Re-Viewing Literature in Hermeneutic Research *International Journal of Qualitative Methods* 2012, 11(1)



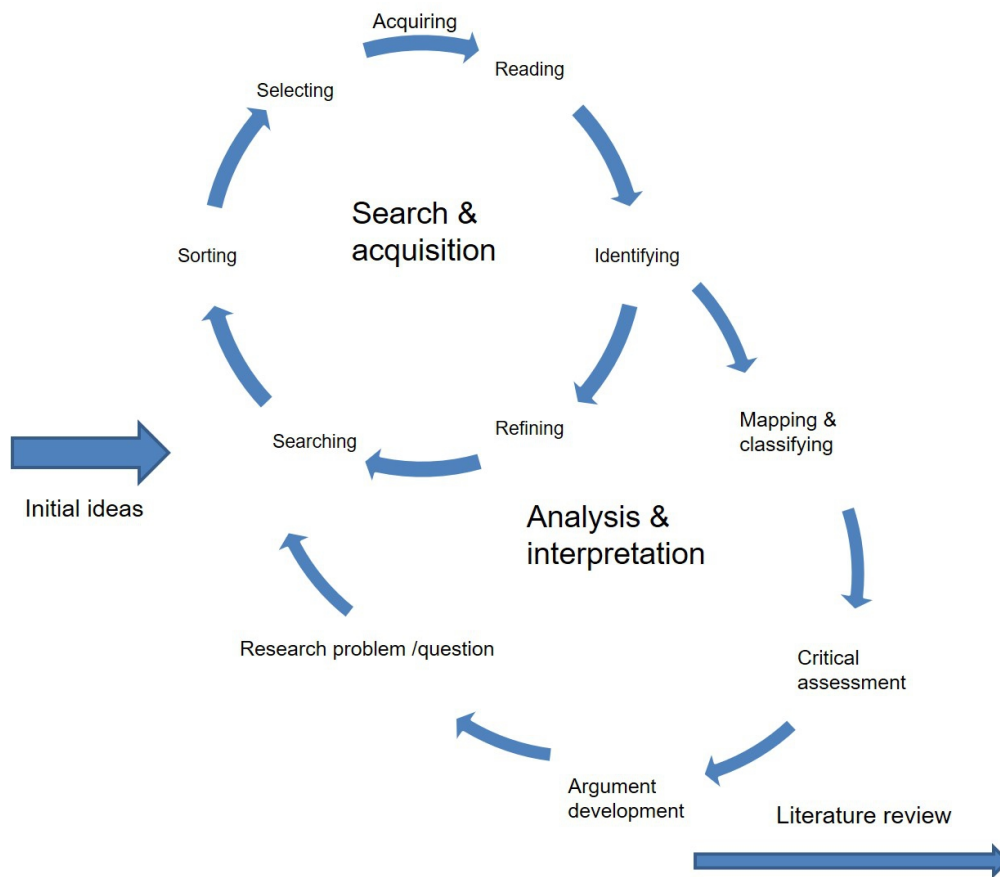

Figure 1

103x90mm (300 x 300 DPI)

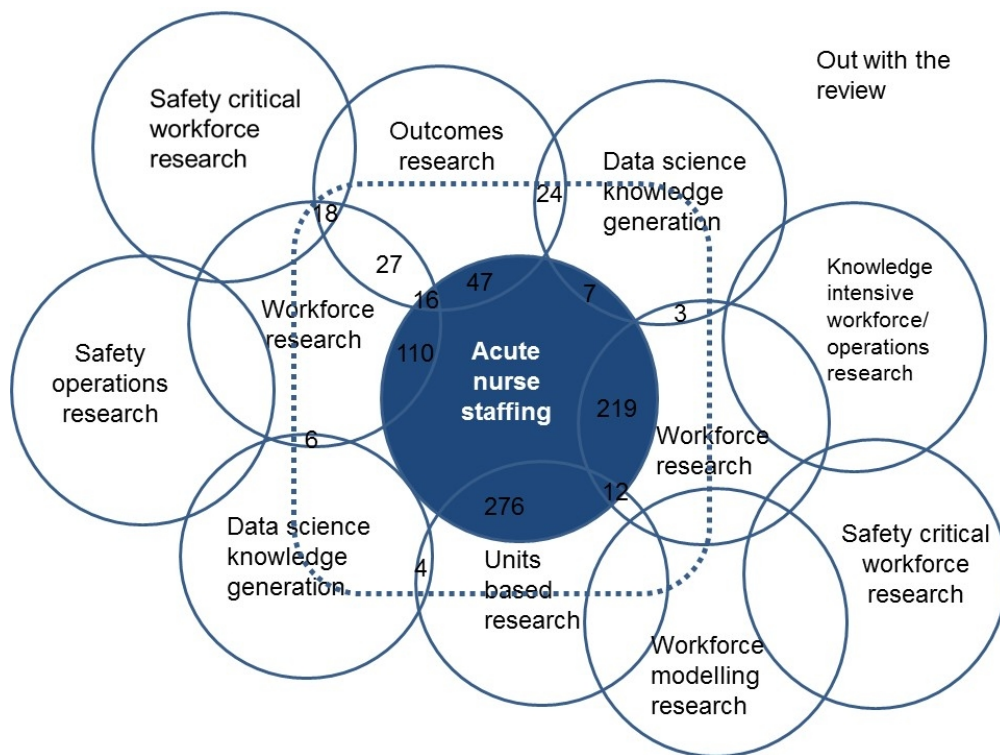

Figure 2 A Venn diagram of areas of enquiry and potential overlap with other interdisciplinary areas-the bordered area contains the literature reviewed herein.

254x190mm (96 x 96 DPI)



Figure 3

121x84mm (300 x 300 DPI)

## Supplementary file

### ***Determining acute nurse staffing, a hermeneutic review of an evolving science.***

#### **Search Strategy**

##### *Database selection*

PubMed, CINAHL, arXiv, CiteSeerX, IEEEXplore

##### *Key words/terms (Boolean)*

“nursing” arXiv, CiteSeerX, IEEEXplore (as this is a minority term) “nurse staffing” “nurse workload” “hospital staffing” “nursing ratios” “safe staffing” “staffing” AND “patient safety” in PubMed and CINAHL

Years searched 2003-2018

##### *Criteria for inclusion*

Primary research, secondary analysis or reviews on any relationship between acute hospital nurse staffing (registered, licenced and unregistered) and an specified outcome.

First iteration used key terms as above.

This yielded 7323 items.

From this 5265 were excluded as these were opinion pieces, editorials, commentaries, proceedings, consensus pieces and papers with no English translation.

2058 Items were initially reviewed

Include systematic reviews (24)

Include primary research (2034)

Exclude other non-peer reviewed work such as reports (23)

Exclude papers which did not meet criteria on reading abstract/full text (1262)

Exclude other material (peer reviewed opinion pieces) (4)

Papers reviewed 769

Mapping and classification by discipline/area of research, major concepts, lens and unit of analysis. The result of this is shown in the main paper.

Critical assessment of the work was for rigour/associations and primarily “gap spotting” To visualise the relationships within discipline areas a Venn diagram was constructed (Figure 2). With the further application for example of Łoś's Theorem, and ultra product could eventually be defined.

Second iteration (as described in methods section)

Search to same criteria adding Nursing AND knowledge intense occupations, safety critical workforce revealed opinion pieces which referenced the terms to describe the labour market but no additional papers reviewed as they did not meet the criteria.
